1 **Associations between exposure to single cadmium, lead, mercury and mixtures**  
2 **and women's infertility and long-term amenorrhea**

3  
4 Maria McClam<sup>1</sup>, Jihong Liu<sup>2</sup>, Yihan Fan<sup>3</sup>, Tingjie Zhan<sup>4,5,6</sup>, Qiang Zhang<sup>7</sup>, Dwayne E.  
5 Porter<sup>1</sup>, Geoffrey I. Scott<sup>1</sup>, Shuo Xiao<sup>4,5,6\*</sup>

6  
7 <sup>1</sup>Department of Environmental Health Sciences, Arnold School of Public Health,  
8 University of South Carolina, Columbia, SC 29208, USA; <sup>2</sup>Department of Epidemiology  
9 and Biostatistics, Arnold School of Public Health, University of South Carolina,  
10 Columbia, SC 29208, USA; <sup>3</sup>Master of Public Health in Epidemiology, Rollins School of  
11 Public Health, Emory University, Atlanta, GA 30322, USA; <sup>4</sup>Department of  
12 Pharmacology and Toxicology, Ernest Mario School of Pharmacy, Rutgers University,  
13 Piscataway, NJ 08854, USA; <sup>5</sup>Environmental and Occupational Health Sciences  
14 Institute (EOHSI), Rutgers University, Piscataway, NJ 08854, USA; <sup>6</sup>Center for  
15 Environmental Exposures and Disease, Rutgers University, Piscataway, NJ 08854,  
16 USA; <sup>7</sup>Gangarosa Department of Environmental Health, Rollins School of Public Health,  
17 Emory University, Atlanta GA 30322, USA

18  
19 **Key words:** heavy metal, reproductive toxicity, infertility, amenorrhea, NHANES

20 **Disclosure summary:** The authors declare no conflict of interest.

21 \*Corresponding author: Shuo Xiao, Ph.D., 170 Frelinghuysen Rd, Rm 406, Piscataway,  
22 NJ, 08854; Tel: + 1-848-445-3729, Email: [sx106@pharmacy.rutgers.edu](mailto:sx106@pharmacy.rutgers.edu)

23 **Abstract**

24 *Purpose.* Cadmium (Cd), lead (Pb), and mercury (Hg) have been shown to exhibit  
25 endocrine disrupting properties. their effects on women’s reproductive health, however,  
26 remain elusive. Here, we investigated associations between blood concentrations of  
27 single of Pb, Cd, Hg, and their mixture and infertility and long-term amenorrhea in  
28 women of reproductive age using the US National Health and Nutrition Examination  
29 Survey (NHANES) 2013-2018 cross-sectional survey.

30  
31 *Methods.* A total of 1,990 women were included for the analysis of infertility and 1,919  
32 women for long-term amenorrhea. The methods of log-transformation and quarterization  
33 were used to analyze blood heavy metal concentrations. Statistical differences in the  
34 covariates between the outcome groups were evaluated using a chi-squared test for  
35 categorical variables and a t-test for continuous variables. Multiple logistic regression  
36 models were used to examine the associations.

37  
38 *Results.* The blood concentrations of Pb and heavy metal mixtures were significantly  
39 higher in ever-infertile women than pregnant women, but the concentrations of Cd and  
40 Hg were comparable. Multiple logistic regression analysis revealed that after the full  
41 adjustment, there was a significant and dose-dependent positive association between  
42 blood Pb concentrations and women’s historical infertility, a negative association  
43 between Cd and women’s long-term amenorrhea, and no associations between Hg and  
44 heavy metal mixture and women’s infertility or long-term amenorrhea.

45

46 *Conclusions.* Our study demonstrates that exposure to heavy metals exhibit differential  
47 associations with women’s infertility and long-term amenorrhea.

48

49

50

51

52

53

54

55

56

57

58

59

60

61

62

63

64

65

66

67

68

## 69 **Introduction**

70 The female reproductive system provides hormonal control and anatomical structure to  
71 sustain a woman's menstrual cycle and fertility. Infertility is the failure of achieving  
72 clinical pregnancy after one year of unprotected intercourse, affecting up to 15% of  
73 couples worldwide.<sup>1,2</sup> In the US, the number of women with impaired fertility has been  
74 estimated to increase from 4.5 million in the early 1980s to about 7.7 million by 2025.<sup>3</sup>  
75 Although women's infertility can be caused by male factors and unexplained reasons,<sup>4</sup>  
76 the majority of them have recognized reproductive or neuroendocrine disorders, such as  
77 premature ovarian insufficiency (POI),<sup>5</sup> oligomenorrhea or amenorrhea,<sup>1</sup> anovulation,<sup>6</sup>  
78 poor gamete quality,<sup>7</sup> and other reproductive diseases such as polycystic ovarian  
79 syndrome (PCOS),<sup>8</sup> endometriosis,<sup>9</sup> and hypothalamic dysfunction.<sup>10</sup> So far, the  
80 mechanism of women's infertility remains incompletely understood but has been  
81 attributed to both genetic factors and exposure to reproductive toxicants.<sup>11</sup>

82  
83 Industrial development, agricultural practices, and the production and use of consumer  
84 products have introduced various toxic substances into the environment, including  
85 heavy metals that are naturally occurring metallic elements with high molecular weight  
86 and density.<sup>12</sup> Cadmium (Cd), lead (Pb), and mercury (Hg) are three primary heavy  
87 metals listed by the World Health Organization (WHO) under the top 10 toxicants of  
88 major public health concern.<sup>13</sup> The environmental contamination of heavy metals  
89 primarily stems from industrial mining, agricultural practice, and fossil fuel and waste  
90 combustion, etc.<sup>14-17</sup> Heavy metals persist and bioaccumulate along the food chain and

91 in drinking water, soils, and air, making them a major source of environmental toxicants  
92 to humans.<sup>18</sup>

93

94 Women's reproductive health is vulnerable to environmental toxins, particularly  
95 endocrine disrupting chemicals (EDCs) that interfere with the body's normal hormone  
96 synthesis, secretion, and signaling.<sup>19,20</sup> Growing epidemiological and experimental  
97 research have revealed that heavy metals exert endocrine disrupting properties,<sup>21-25</sup>  
98 implicating the possible causative relationship between exposure to heavy metals and  
99 women's infertility and other reproductive disorders. In a cross-sectional study that  
100 compared 310 women with clinically diagnosed infertility and 57 pregnant women in  
101 Taiwan, the blood concentrations of Pb but not Cd in infertile women were significantly  
102 higher than pregnant women.<sup>26</sup> Another study compared 82 infertile and 42 pregnant  
103 women in the US and found that there were positive associations between blood  
104 concentrations of Pb and Cd and women's infertility.<sup>27</sup> Heavy metals have also been  
105 shown to affect reproductive hormone secretion. In premenopausal women, the blood  
106 concentrations of Cd, Pb, and Hg were associated with altered means and amplitudes  
107 of follicle stimulating hormone (FSH) and luteinizing hormone (LH), two gonadotropins  
108 that regulate ovarian follicle maturation, hormone secretion, and ovulation.<sup>28</sup> It was also  
109 found in the same study that Pb may increase progesterone levels in the follicular  
110 phase, and both Pb and Hg cause a delay of the progesterone rise in the mid-luteal  
111 phase.<sup>28</sup>

112

113 Experimental research has documented that exposure to heavy metals may impact the  
114 female reproductive cycle and fertility. For example, Cd exposure in mice compromised  
115 oocyte meiotic and developmental competence by inducing oocyte oxidative stress,  
116 early apoptosis, and epigenetic modifications, which eventually resulted in decreases in  
117 litter size.<sup>29</sup> Pb has been found to delay vaginal opening, decrease estradiol secretion,  
118 and interfere with ovarian cyclicity in rats, suggesting the harmful effects of Pb on the  
119 ovaries or the entire hypothalamic-pituitary-gonadal (HPG) axis.<sup>30</sup> Heavy metals may  
120 also act as agonists or antagonists to disrupt hormone receptor-mediated signaling. All  
121 Cd, Pb, and Hg have been reported to exert estrogenic effects by binding to the  
122 estrogen receptor  $\alpha$  and/or  $\beta$ , which may disrupt the expression of estrogen target  
123 genes and the proliferation and/or differentiation of estrogen-responsive tissues such as  
124 the endometrium.<sup>23,24</sup> Altogether, existing epidemiological and experimental evidence  
125 suggests that exposure to heavy metals may perturb women's menstrual cycle and  
126 fertility by interfering with the homeostasis of the HPG axis, ovarian steroidogenesis,  
127 hormonal signaling, and other reproductive events. However, the majority of the  
128 epidemiological studies have small sample sizes and do not consider the complexities  
129 of the female reproductive cycle and fertility;<sup>26-28,31</sup> moreover, previous studies primarily  
130 focused on a single metal at a time, but women are periodically or even constantly  
131 exposed to mixtures of multiple heavy metals, which may cause cumulative effects.<sup>26-</sup>

132 28,31-33

133  
134 The objective of this study is to investigate associations between blood concentrations  
135 of single Pb, Cd, Hg and their mixtures and reproductive aged women's infertility in the

136 National Health and Nutrition Examination Survey (NHANES) 2013-2018; moreover, the  
137 associations between heavy metals and women's long-term amenorrhea, a crucial  
138 contributing factor to women's infertility, was assessed. We hypothesize that women  
139 with higher blood heavy metal concentrations are more likely to experience infertility and  
140 long-term amenorrhea. We combined our robust understanding of female reproductive  
141 biology and epidemiology to create a comprehensive evaluation of the impacts of  
142 exposure to single heavy metals and their mixtures on women's reproductive health.

143

## 144 **Materials and Methods**

### 145 Study population

146 All data were obtained from NHANES, a nationally representative cross-sectional  
147 survey of the non-institutionalized U.S. population. NHANES is conducted by the US  
148 Centers for Disease Control and Prevention (CDC) and uses a complex multistage,  
149 probability sampling design. Since 1999, the sample design has consisted of multi-year,  
150 stratified, clustered four-stage samples, with data released in 2-year cycles. NHANES  
151 samples are drawn in four stages: (1) Primary sampling units (PSUs) (counties, clusters  
152 of tracts within counties, or combinations of neighboring counties), (2) segments within  
153 PSUs (census blocks or groupings of blocks), (3) dwelling units (DUs) (households)  
154 within segments, and (4) individuals within households. Screening is conducted at the  
155 DU level to identify individuals, based on oversampling criteria. NHANES oversamples  
156 some subgroups to increase the reliability and precision of health status indicator  
157 estimates for these particular subgroups; the population subgroups chosen for  
158 oversampling directly determine the sampling domains used to select the sample at all

159 stages.<sup>34</sup> In this study, we used data from three continuous NHANES cycles, including  
160 2013-2014, 2015-2016, and 2017-2018, where the reproductive health questionnaire  
161 addressed women's infertility and menstrual cycle. All data including sociodemographic  
162 questionnaires, physical examinations, and reproductive health questionnaires, were  
163 downloaded directly from the CDC's website.<sup>35</sup>

164

#### 165 Study sample, variable descriptions, and inclusion

166 Among all three NHANES cycles, one-half of participants age 12+ have blood heavy  
167 metal data for the cycles of 2013-2014 and 2015-2016. All participants aged 1+ have  
168 blood heavy metal data available for the cycle of 2017-2018. The total number of  
169 participants in these three NHANES cycles was 20,113. After excluding males  
170 (n=9,934), females younger than 20 years (n=4,589), and females older than 49 years  
171 (n=2,843), there were 2,747 reproductive aged women (20-49 years) who had blood  
172 heavy metal data available. Although post-pubertal women under 20 years are also  
173 considered within reproductive age, they were not included because NHANES survey  
174 was designed to only collect reproductive data from participants 20 years of age and  
175 older. Moreover, women who had a hysterectomy (n=125) and women with missing  
176 data for the heavy metal exposures (n=136) were also excluded. Figures 1 and 2  
177 describe the sample attrition process and amount of missingness. Participants with  
178 missing data for the questions of infertility (n=272), demographic variables (n=197), BMI  
179 (n=14), and information on the use of birth control pill and female hormones (n=4) were  
180 also excluded. Overall, a total of 1,999 women were included for comparing ever-  
181 infertile and fertile women (main group), and a total of 297 participants were included for



182 comparing ever-infertile and pregnant women (sub-group) (Figure 1). For assessing  
183 long-term amenorrhea, participants with missing data for the questions of long-term  
184 amenorrhea (n=361), demographic variables (n=190), BMI (n=12), and information on  
185 the use of birth control pill and female hormone use (n=4) were also excluded. Overall,  
186 a total of 1,919 women were included for assessing long-term amenorrhea (Figure 2).

187

### 188 Measurements of blood Pb, Cd, Hg concentrations

189 The blood concentrations of Pb, Cd, and Hg were measured in the whole blood using  
190 the mass spectrometry after a simple dilution sample preparation step. The full  
191 NHANES laboratory procedures can be found online.<sup>36-38</sup> The lower limit of detection  
192 (LLOD) of the three measured metals were: 0.07 µg/dL for Pb, 0.1 µg/dL for Cd, and  
193 0.28 µg/dL for Hg. For analytes with analytic results below the LLOD, an imputed fill  
194 value was placed in the analyte results field. This value is LLOD divided by the square  
195 root of 2 (LLOD/sqrt [2]).

196

### 197 Creating a metal mixture value

198 Previous studies have used simple additive methods by summing all metal scores with  
199 equal weight to create a score of the metal mixture.<sup>39,40</sup> Here, we aimed to further fine  
200 tune this mixed metal score by using a novel method, toxic equivalency (TEQ) values  
201 that are a weighted quantity measure based on the relative toxicity potency of each  
202 chemical. TEQ values are used for reporting dioxin and dioxin-like compounds.<sup>41</sup> We  
203 used a similar methodology to create TEQ values for the mixture of the three heavy  
204 metals. Pb, Cd, and Hg have been shown to exhibit similar toxic mechanisms by

205 inducing oxidative stress and endoplasmic reticulum (ER) stress,<sup>42,43</sup> which  
206 compromises the reduction-oxidation hemostasis and eventually results in adverse  
207 health outcomes.<sup>44-46</sup> ER stress has also been revealed as a key molecular mechanism  
208 in various female reproductive functions and disorders, such as ovarian injury via ER  
209 stress-mediated apoptosis/autophagy, regulation of gestational length by the uterine ER  
210 stress, oocyte maturation, and embryo implantation.<sup>47-50</sup>

211  
212 In the federal Tox21 program, the ER Stress Response Element  $\beta$ -lactamase reporter  
213 gene assay (ESRE-bla) is used to screen potential toxicants, including heavy  
214 metals.<sup>51,52</sup> Pb, Cd, and Hg in certain form have been shown to be 'active' in  
215 TOX21\_ESRE\_BLA assay, while other high-throughput assays related to oxidative  
216 stress lack the screening results for all three heavy metals in this study. Data from the  
217 assay component TOX21\_ESRE\_BLA\_ratio were extracted from the CompTox  
218 Chemistry Dashboard for Lead(II) acetate trihydrate, Cadmium acetate dihydrate, and  
219 Mercury(II) acetate.<sup>53</sup> The concentration of the half-maximal activity (AC50), a common  
220 potency measure applied in pharmacological research and toxicity testing<sup>54</sup> was  
221 identified for each heavy metal: Lead(II) acetate trihydrate AC50 = 0.0586  $\mu$ M,  
222 Cadmium acetate dihydrate AC50 = 0.0545  $\mu$ M, and Mercury(II) acetate AC50 = 2.29  
223  $\mu$ M. The maximal response or efficacy of the three heavy metals are in the same order  
224 of magnitude, with that of Cd and Hg within two-fold of Pb, which is used as the  
225 reference metal to calculate the TEQ values of the other two.<sup>55,56</sup> Using AC50, the  
226 adjusted metal weights were 4.831e-2 for Pb, 9.565e-3 for Cd, and 1.276e-4 for Hg.  
227 The final mixed metal score was calculated using the sum of weighted blood metal

228 concentrations as follows: Mix Metal Score = [(1\*Pb Blood Metal Concentration,  
229  $\mu\text{g/dL} \times 10 / 207 \text{ g/mol}$ ) + (1.0752\*Cd Blood Metal Concentration,  $\mu\text{g/L} / 112.41 \text{ g/mol}$ ) +  
230 (0.0256\*Hg Blood Metal Concentration,  $\mu\text{g/L} / 200.59 \text{ g/mol}$ )] \*100. The simplified  
231 formula is [(4.831e-2\*Pb Blood Metal Concentration) + (9.565e-3\*Cd Blood Metal  
232 Concentration) + (1.276e-4\*Hg Blood Metal Concentration)] \*100. Following TEQ  
233 approach, we refer to this as our metal mixture value of exposure throughout the paper.

234

### 235 Women's infertility history

236 The prevalence of infertility among women aged 20-49 was assessed using the  
237 question "Have you ever attempted to become pregnant over a period of at least a year  
238 without becoming pregnant?".<sup>1</sup> Women who responded "Yes" were considered ever-  
239 infertile. Fertile women were defined in two distinct ways: (1) fertile women or the main-  
240 group were women who answered "No" to the question of "Have you ever attempted to  
241 become pregnant over a period of at least a year without becoming pregnant?", and (2)  
242 pregnant women or the sub-group who answered "Yes" to the question "Are you  
243 pregnant now?". Infertility defined using this method represents a women's history of  
244 infertility and may not reflect their current fertility status; hence we also analyzed  
245 women's recent long-term amenorrhea in this study.

246

### 247 Women's recent long-term amenorrhea

248 Women with long-term amenorrhea were defined by those who answered "no" to the  
249 question "Have you had at least one menstrual period in the past 12 months? (Please  
250 do not include bleedings caused by medical conditions, hormone therapy, or

251 surgeries.)” and answered “Other” or “Don’t know” to the question “What is the reason  
252 that you have not had a period in the past 12 months?”. Menstruating women were  
253 defined by women who answered “Yes” to the same question. Participants who  
254 answered “Pregnancy”, “Breast feeding”, and “Menopause/Change of life” to the  
255 question “What is the reason that you have not had a period in the past 12 months?”  
256 were excluded from this study. The outcome variable long-term amenorrhea defined  
257 here reflects the women’s current or recent menstrual cycle status in the past 12  
258 months. Although menopause is defined as amenorrhea for 12 consecutive months,<sup>57</sup>  
259 these women did not self-report having menopause; thus, our outcome of long-term  
260 amenorrhea may reflect their most recent (last 12 months) or current fertility status.

261

#### 262 Other Covariates

263 Age was included as a covariate because age is an important factor determining a  
264 woman’s menstrual cycle, menopause, and fertility. Demographic variables including  
265 race/ethnicity, education, family poverty income ratios were all included as covariates.  
266 Because this study assessed women’s reproductive capacity, which closely ties to  
267 sexual relationships, we included marital status as a covariate. We also included health  
268 insurance coverage as a covariate because health care access can impact participants’  
269 reproductive health and fertility management.<sup>58</sup> Smoking status and BMI were included  
270 because they have been shown to impact women’s reproductive health.<sup>59,60</sup> BMI was  
271 defined by the CDC as underweight (<18.5), healthy weight (18.5 to <25), overweight  
272 (25 to <30), and obesity (30 or higher).<sup>61</sup> Hormonal contraception use was included  
273 because women are often prescribed hormones to regulate menstruation or prevent

274 menstruation and unintended pregnancy. Hormonal contraception use included women  
275 who have ever taken birth control pills or used female hormones. Additionally, when  
276 assessing infertility as an outcome, two additional covariates were included: regular  
277 menstruation and if women had seen a doctor because they were unable to be  
278 pregnant. Menstruation directly impacts women's fertility and women who see a doctor  
279 sooner for their fertility might be more likely to become pregnant in a year through  
280 assisted reproductive technology (ART) such as *in vitro* fertilization (IVF) and  
281 intrauterine insemination (IUI). We adjusted for the long-term amenorrhea when  
282 assessing for infertility because regular menstruation impacts infertility as well as blood  
283 metal concentrations. For example, the intestinal absorption of Cd, Pb, and Hg  
284 increases when the body iron stores are depleted<sup>62</sup> and menstruating women are more  
285 likely to have low iron stores.<sup>63</sup>

286

### 287 Statistical Analysis

288 For NHANES datasets, the use of sampling weights and sample design variables is  
289 recommended for all analyses because the sample design is both a clustered design  
290 and incorporates differential probabilities of selection. Statistical Analysis Software v9.4  
291 (SAS Institute, Cary, NC) was used to perform all statistical analyses, incorporating  
292 sampling weights and non-responses while adjusting for cluster (PSUs) and strata of  
293 the complex sample design in NHANES.<sup>64,65</sup> Weighting was calculated using NHANES  
294 sub-sample weights and were calculated according to NHANES protocols and  
295 documentation.<sup>66</sup>

296

297 Descriptive statistics were calculated for both outcomes and exposures: Cd, Pb, Hg,  
298 and the mixture (Mix). Statistical differences in the covariates between the outcome  
299 groups were evaluated using a chi-squared test for categorical variables and a t-test for  
300 continuous variables. Because blood concentrations of Pb, Cd, and Hg had skewed  
301 distributions based on normality tests, log transformed metal values were used. In  
302 addition to assessing the blood concentrations continuously, we also categorized the  
303 data into quartiles using the lowest quartile as the reference group. Multiple logistic  
304 regression analysis was used to evaluate the independent association between blood  
305 metal concentrations and metal mixture values and infertility after adjusting for above-  
306 mentioned covariates. The same approach was used to evaluate associations between  
307 blood metal concentrations and metal mixture values and long-term amenorrhea. Crude  
308 odds ratios (OR) and adjusted ORs and their corresponding 95% confidence intervals  
309 (CI) were presented. We used three models to examine associations between women's  
310 blood heavy metal concentrations and historical infertility (Table 3). In model 1, crude  
311 odds ratios (OR) were calculated without adjusting for any covariates. In model 2, an  
312 adjusted model was applied by including all covariates except for the other two metals  
313 not being assessed. In model 3, a fully adjusted model was run, which included all  
314 covariates including the other two metals.

315  
316 Several sensitivity analyses were conducted to examine the robustness of our findings.  
317 First, we determined that there was a difference in infertility status among the 80  
318 additional women included in the infertility group (n=1,999) compared to the long-term  
319 amenorrhea group (n=1,919). This helped us determine that there was sufficient reason

320 to keep both outcomes (infertility and long-term amenorrhea) as separate population  
321 groups rather than taking the smaller sample size for analysis. Second, using a chi  
322 squared test, we examined the difference in infertility status among women who may  
323 have seen a doctor and received assistance to become pregnant versus those who did  
324 not. The question of “seen a doctor because unable to become pregnant?” helped us  
325 define if an individual received medical assistance to help with her fertility or not. The  
326 purpose of this was to have additional descriptive information regarding the study  
327 population. Third, we examined the relation between long-term amenorrhea and  
328 infertility history using a chi-squared test.

329

## 330 **Results**

### 331 Exposure to heavy metals and women’s infertility

#### 332 *Study population*

333 As shown in Table 1, a total of 238 or 12.8% of women were considered ever-infertile.  
334 These ever-infertile women were compared to two control groups: the main group of  
335 1,761 women who self-reported being fertile and the sub-group of 59 pregnant women.  
336 Compared to fertile women, women who have been ever-infertile were more likely to be  
337 older, married, obese, smokers, and had seen a doctor because they were unable to  
338 become pregnant (all  $p$ -values < 0.05). The race/ethnicity, educational level, poverty  
339 income ratio, hormone-based contraception use, and having a period in the last 12  
340 months were similar between ever-infertile and fertile women. Compared to pregnant  
341 women, ever-infertile women were more likely to be older, covered by health insurance,  
342 and had seen a doctor because they were unable to become pregnant (all  $p$ -values <

343 0.05). The distributions of race/ethnicity, education level, marital status, poverty income  
344 ratio, BMI, smoking, use of hormonal contraception, and having a period in the last 12  
345 months were similar between ever-infertile and pregnant women.

346  
347 The question “seen a DR b/c unable to become pregnant?” enabled us to define if a  
348 woman received medical assistance to achieve pregnancy. In the main group, 166  
349 (8.3%) women reported seeing a doctor of which 136 (6.8%) were ever-infertile  
350 compared to 30 (1.5%) who self-reported to be fertile. In the sub-group, 137 (46.1%)  
351 women reported seeing a doctor of which 136 (45.8%) were ever-infertile compared to  
352 only one woman (0.3%) who was pregnant. Women who had seen a doctor were  
353 substantially more likely to be ever-infertile in both the main group and sub-group  
354 women ( $p$ -value  $<.001$ ).

355  
356 *Bivariate results and metal exposures*

357 The median and log transformed means of blood heavy metal concentrations in women  
358 with various fertility status are summarized in Table 2 and illustrated in Figures 3 and 4.  
359 With respect to the main group analysis, there was no significant difference for the  
360 blood concentrations of all three single heavy metals and mixtures between ever-  
361 infertile and self-reported fertile women (Figure 3). In the sub-group analysis, women  
362 who have been ever-infertile had significantly higher concentrations of blood Pb and  
363 heavy metal mixture than pregnant women (Table 2 and Figure 4). The blood  
364 concentrations of Cd and Hg, however, were comparable in the main and sub-groups  
365 (Table 2 and Figure 3 and 4).



366

367 *Multiple logistic regression analysis results*

368 Multiple logistic regression analysis showed that after full adjustment including  
369 demographic characteristics, lifestyle factors, and two metals not being assessed  
370 (model 3), there was a positive association between blood Pb concentrations and  
371 women's ever-infertility. The continuous log transformed data of both the main-group  
372 and sub-group analyses showed that as blood Pb concentrations increased, women  
373 were more likely to be ever-infertile (OR: 1.75, 95% CI: 1.01-3.02; and OR: 3.09, 95%  
374 CI: 1.22-7.85, respectively, Table 3). The results of model 1 with crude OR and model 2  
375 with adjustments of all covariates but not two metals not being assessed showed similar  
376 results, except that the crude OR of the main group analysis is insignificant (Table 3).

377

378 Multiple logistic regression results for the categorical data in model 3 revealed that there  
379 was no association between Pb and infertility for all quartiles of 2, 3 and 4 compared  
380 with the lowest quartile 1 in the main group analysis (ever-infertile vs. fertile). However,  
381 for the sub-group analysis (ever-infertile vs. pregnant), the blood concentrations of Pb in  
382 quartiles 3 and 4 were significantly associated with women's historical infertility (OR:  
383 3.47, 95% CI: 1.11-10.83; and OR: 5.26, 95% CI: 1.18-23.54, respectively), and the OR  
384 from quartiles 2 to 4 exhibited a dose-dependent relationship (Table 3). The results of  
385 model 1 with crude OR and model 2 with adjustments of all covariates but not two  
386 metals not being assessed showed similar results (Table 3).

387

388 With respect to Cd and Hg summarized in Table 3, the results of both continuous and  
389 categorical multiple logistic regression analyses in all three models revealed no  
390 significant associations except that the increase of blood concentrations of Hg in the  
391 quartile 3 was significantly associated with women's infertility in model 2 of the sub-  
392 group analysis (OR: 2.53, 95% CI: 0.64-11.78). Regarding the heavy metal mixture,  
393 model 3 showed no significant associations between the metal mixture and women's  
394 infertility in both the main and sub-group analyses. Contrarily, sub-group analysis in  
395 models 1 and 2 revealed that metal mixtures are positively associated with women's  
396 ever-infertility; since models 1 and 2 did not adjust for the single metals, this is likely due  
397 to the positive association found between Pb and infertility. Collectively, these results  
398 indicate that after full adjustment, exposure to Pb increases the odds of women's  
399 historical infertility; further, no associations were found between Cd, Hg, and the mixture  
400 of all three metals and women's historical infertility.

401

#### 402 Women's historical infertility is not associated with their recent long-term amenorrhea

403 We next examined associations between women's historical infertility and recent long-  
404 term amenorrhea. A total of 1,918 women had complete data of both infertility and long-  
405 term amenorrhea (Table 4). There was no statistical correlation between women's long-  
406 term amenorrhea and historical infertility (p-value = 0.29), although the percentage of  
407 long-term amenorrhea in women who were ever-infertile (3.9%) was slightly lower than  
408 that in fertile women (5.6%) and the percentage of historical infertility in women with  
409 long-term amenorrhea (8.7%) was lower than that in menstruating women (12.2%). This  
410 negative association suggests that women's historical infertility does not reflect their

411 recent reproductive status. The NHANES survey asked “*Have you had at least one*  
412 *menstrual period in the past 12 months?*” Because the absence of a period or  
413 amenorrhea for 12 consecutive months has been suggested as an important indicator of  
414 menopause,<sup>57</sup> the long-term amenorrhea may reflect women’s most recent reproductive  
415 and fertility status. Thus, as a secondary outcome, we chose to investigate associations  
416 between heavy metal exposure and women’s recent long-term amenorrhea.

417

## 418 Exposure to heavy metals and women’s long-term amenorrhea

### 419 *Study population*

420 As shown in Figure 2, a total of 1,919 participants were included to assess long-term  
421 amenorrhea after further deleting participants with missing data on long-term  
422 amenorrhea (n=361), demographic variables (n=190), BMI (n=12), and information on  
423 the use of birth control pill and female hormone use (n=4). The characteristics of these  
424 women are summarized in Table 5. Compared with menstruating women, women with  
425 long-term amenorrhea were more likely to be Non-Hispanic White and Non-Hispanic  
426 Black ( $p$ -value < 0.05) compared to other ethnicities. However, the distributions of age,  
427 educational level, marital status, health insurance coverage, poverty income ratio, BMI,  
428 smoking history, and hormone-based contraception use were largely similar between  
429 menstruating women and women with long-term amenorrhea (all  $p$ -values > 0.05).

430

### 431 *Bivariate results and heavy metal exposures*

432 The median and log transformed means of blood heavy metal concentrations are shown  
433 in Table 6 and illustrated in Figure 5. Compared with menstruating women, women with

434 long-term amenorrhea had comparable blood concentrations of Pb, Cd, and heavy  
435 metal mixtures but had significantly higher median blood concentrations of Hg (Figure  
436 5).

437

#### 438 *Multiple logistic regression model results*

439 Table 7 summarizes associations between blood heavy metal concentrations and  
440 women's long-term amenorrhea assessed by three models as we described in the  
441 fertility analysis. Multiple logistic regression analysis from continuous and categorical  
442 data showed no significant associations between blood concentrations of Pb or Hg and  
443 women's long-term amenorrhea in all three models. In the categorical multiple logistic  
444 regression analysis, after the full adjustment in model 3, there was a negative  
445 association between the blood Cd concentrations in quartiles 2 and 3 and women's  
446 long-term amenorrhea (quartile 2 OR: 0.47, 95% CI: 0.25-0.87; quartile 3 OR: 0.31,  
447 95% CI: 0.13-0.76). Similar to model 3, the results of model 1 and 2 also showed an  
448 inverse association between the blood concentrations of Cd in quartiles 2 and 3 and  
449 long-term amenorrhea. The ORs, although still less than 1, were higher for quartile 4  
450 than those for quartiles 2 and 3 in all three models but were not statically significant  
451 (Table 7). For the mixture of all three heavy metals, all three models showed  
452 insignificant associations between blood metal mixture concentrations and long-term  
453 amenorrhea.

454

#### 455 **Discussion**

456 About 10-15% of women of reproductive age experience infertility.<sup>67,68</sup> Accumulating  
457 evidence reveals the endocrine disrupting effects of heavy metals, suggesting their  
458 possible contributions to women's impaired fertility and other reproductive disorders.  
459 Here, we performed a cross-sectional analysis of NHANES 2013-2018 to investigate  
460 associations between exposure to single Cd, Pb, Hg and mixtures and women's  
461 infertility and long-term amenorrhea. Our results show that (1) the blood concentrations  
462 of Pb and heavy metal mixtures were significantly higher in ever-infertile women than  
463 pregnant women, but the concentrations of Cd and Hg were comparable; (2) exposure  
464 to Pb is positively associated with women's historical infertility; and (3) the increase of  
465 blood concentrations of Cd is inversely related to women's recent long-term  
466 amenorrhea.

467  
468 Comparisons of blood heavy metal levels between this study and guidelines from  
469 federal or other organizations.

470 So far, there are no recognized biological functions of Pb, Cd, and Hg for human health.  
471 The typical blood levels of Pb in adults is less than 1 µg/dL, and 5 µg/dL is designated  
472 as the elevated blood lead level in adults by the US CDC.<sup>69</sup> This is also the level for  
473 required medical removal in the workplace if occupational exposures exist for women  
474 who are pregnant or are trying to be pregnant due possible reproductive and  
475 developmental adversities.<sup>70</sup> In our study, 81.5% of women had blood Pb levels < 1  
476 µg/dL, 17.9% had levels at 1-5 µg/dL, and 11 women (0.55%) had levels > 5 µg/dL. The  
477 blood levels of Cd are usually < 5 µg/L, with most in the range of 0.5-2 µg/L; Blood Cd  
478 levels of 50 µg/L or more have been shown to cause acute toxicities.<sup>71,72</sup> The women's

479 blood concentrations of Cd in our study ranged from 0.07 - 5.14 µg/L, with only one  
480 woman having blood Cd levels > 5 µg/L and 97.2% had levels < 2 µg/L. The blood  
481 concentrations of Hg are usually < 10 µg/L. Significant exposure is defined when the  
482 concentration is > 50 µg/L if exposure is due to alkyl Hg, or > 200 µg/L if exposure is  
483 due to Hg(2+).<sup>73</sup> In our study, women's blood Hg concentrations ranged from 0.2 - 26.87  
484 µg/L, with 99.1% of them having Hg levels <10 µg/L and 18 women (0.9%) having blood  
485 Hg levels >10 µg/L. Altogether, the percentages of women that exceeded typical or  
486 normal levels of blood heavy metals were 18.5% for Pb, 0.05% for Cd, and 0.9% for Hg.  
487 Observed elevated blood heavy metal levels, particularly for Pb, pose a threat to  
488 women's reproductive health and fertility, highlighting an urgent unmet need to prevent  
489 and reduce heavy metal exposure.

490

#### 491 Impacts of heavy metal exposure and women's fertility and menstrual cycle

492 The impacts of heavy metal exposure on women's fertility and menstrual outcomes  
493 remain elusive. Consistent to our data, a cross-sectional study in Taiwan from Lei et al.  
494 and another cross-sectional analysis by Lee et al. using NHANES 2013-2016 found that  
495 the blood concentrations of Pb in ever-infertile women were significantly higher than  
496 pregnant woman and this association was dose-dependent.<sup>26,27</sup> Similar to Lee et al., we  
497 also found a positive association between the log transformed Pb concentrations and  
498 women's infertility, but we found a negative association between Cd and long-term  
499 amenorrhea after quarterization. We also discovered similar results to another  
500 NHANES 2013-2016 analysis that found no associations between Hg and infertility.<sup>74</sup>

501

502 The absorption, distribution, metabolism, and excretion (ADME) of metals, particularly  
503 Cd, depend on nutritional status. The intestinal absorption of Cd increases when the  
504 body iron stores are depleted.<sup>62</sup> In addition, women typically have higher levels of Cd  
505 than men because women are more susceptible to having low iron stores due to the  
506 monthly menstruation.<sup>63,75</sup> It has also been found that people with vegan/vegetarian  
507 diets often have low iron, while concurrently these people on vegan/vegetarian diets  
508 tend to have higher blood levels of Cd.<sup>76</sup> These results suggest that although we did not  
509 anticipate Cd being protective against women's long-term amenorrhea, it is possible  
510 that women who have normal menstruation and thus the metal transporters in the GI  
511 track are more upregulated than amenorrhea women tend to have higher blood levels of  
512 Cd, resulting in a negative association in our analysis. Therefore, future research is  
513 necessary to consider associations between Cd levels, dietary patterns, iron levels, and  
514 amenorrhea.

515  
516 So far, evidence regarding the effects of heavy metal exposure on women's  
517 reproduction is limited and inconsistent; however, the rationale behind our observed  
518 associations can be explained by previous *in vitro* and *in vivo* studies.<sup>23,77-81</sup> With  
519 respect to Pb, results from experimental research suggest that Pb may impact female  
520 fertility through various mechanisms, including disrupting menstrual cycle, altering  
521 hormone levels, and impairing fetal development.<sup>82,83</sup> It was also found in mice that Pb  
522 accumulates in the ovary and disrupts folliculogenesis, decreases ovarian reserve, and  
523 increases follicle atresia,<sup>79,81,84,85</sup> suggesting that all these Pb-induced reproductive

524 toxicities may contribute to women's historical infertility observed in our NHANES  
525 analysis.

526

527 Animal studies found that Cd may adversely impact female reproduction.<sup>85</sup> For example,  
528 Cd has been shown to decrease the number of growing follicles,<sup>85-87</sup> induce follicle  
529 atresia,<sup>85,88</sup> alter follicular cell structure,<sup>85,89,90</sup> decrease ovarian reserve,<sup>85,91,92</sup> reduce  
530 FSH and LH levels,<sup>85,93</sup> and increase ovarian cycle length.<sup>80,85</sup> Additionally, Cd has also  
531 been found to affect follicle maturation, induce luteolysis,<sup>85,94</sup> and thicken  
532 endometrium.<sup>23,85</sup> All these results suggest that exposure to Cd may impair women's  
533 fertility. However, results obtained from epidemiological studies have been conflicting.  
534 Several cohort studies investigating associations between exposure to Cd and women's  
535 fertility had conflicting results including no associations<sup>95</sup> or even reduced fecundity.<sup>96</sup> In  
536 contrast, Cd has also been found to disrupt reproductive hormone secretion.<sup>78,97</sup> A study  
537 from Lee et al. discovered an inverse relationship between blood concentrations of Cd  
538 and Anti-Mullerian hormone (AMH) – a peptide hormone secreted from growing follicles  
539 and is commonly used as a biomarker of ovarian reserve, suggesting that exposure to  
540 Cd may increase women's infertility risk by diminishing ovarian reserve.<sup>98</sup> Collectively,  
541 as we study the role of nutrition status on the toxicokinetics of Cd, it is essential to  
542 integrate both experimental and epidemiological evidence and include all possible  
543 confounding factors to determine the effects of Cd on women's reproductive health and  
544 fertility.

545



546 Experimental evidence reveals that Hg accumulates in the ovaries and impacts female  
547 reproduction<sup>77,85,99</sup> by interfering with the secretion patterns of gonadotropins of LH and  
548 FSH, altering ovarian cyclicity, and inducing follicular cell apoptosis and follicle  
549 atresia.<sup>85,100-102</sup> Although some other studies reported that Hg is associated with female  
550 infertility, the evidence to support this is limited and inconclusive.<sup>77,85,103,104</sup> Thus,  
551 evidence is inadequate to draw meaningful conclusions about how Hg impacts female  
552 reproductive outcomes, underscoring the need for additional research.

553  
554 Heavy metal mixtures on women's fertility in epidemiological and experimental studies

555 Previous studies have examined heavy metals and individual reproductive outcomes  
556 without examining the complexities of reproductive cycles and the interactions of these  
557 exposures. Both epidemiological and experimental literature is lacking for assessing the  
558 mixture of heavy metals on women's reproductive outcomes. Previous studies  
559 assessing other health outcomes have used the simple concentration additive method  
560 or other statistical methods<sup>105</sup> for combining metals.<sup>39,40</sup> Here, we integrated multiple  
561 heavy metal concentrations by considering each individual metal's toxicity related to the  
562 ER stress, a key mediator of the adverse outcome pathway in female reproduction.<sup>49,106</sup>  
563 EPA's framework for metal risk assessment outlines that some metals act additively  
564 while others are antagonistic or synergistic when they are present together.<sup>107</sup> These  
565 interactions occur during absorption, excretion, or sequestration.<sup>107</sup> However, the exact  
566 fate and joint effects of Pb, Cd, and Hg together in women has yet to be determined;  
567 additionally, metal mixtures in women can be dependent on other factors that are  
568 different across individuals, making it hard to quantify.

569

### 570 The link between women's infertility and long-term amenorrhea

571 The menstrual cycle, or periodic vaginal bleeding due to the shedding of uterine  
572 endometrium, is regulated by the cyclic changes of reproductive hormones, including  
573 both gonadotropins from the pituitary and sex hormones from the ovaries.<sup>108</sup>  
574 Pathological amenorrhea that are not caused by pregnancy, lactation, or menopause  
575 occurs in 3 – 4% of women in the US.<sup>109,110</sup> In our study, we found no association  
576 between women's ever-infertility and their recent long-term amenorrhea, suggesting that  
577 women's recent menstrual cycle status does not reflect their fertility history. It is also  
578 likely that amenorrhea is only one of many complex contributing factors towards  
579 women's fertility success. For example, although up to 25% of infertile women have  
580 disturbed menstrual cycle such as amenorrhea,<sup>1,111</sup> infertility can also be attributed to  
581 sperm defects from the male partner and other unexplained reasons.<sup>4</sup> The underlying  
582 mechanism of women's amenorrhea remains poorly understood and has been  
583 attributed to both genetic and environmental factors.<sup>112,113</sup> In addition to causing  
584 infertility, amenorrhea can have additional health consequences. For example, continual  
585 anovulation for two to three years increases the risk of developing endometrial  
586 cancer,<sup>114</sup> suggesting that long-term amenorrhea is a risk factor of other female  
587 reproductive disorders.

588

### 589 Advantages and limitations

590 This study overcomes several limitations in previous papers using NHANES database  
591 to investigate associations between heavy metals and women's infertility.<sup>27,74</sup> First, both

592 of these studies only included participants from two NHANES cycles (2013-2014 and  
593 2015-2016), whereas we further added the cycle of 2017-2018. Second, the study from  
594 Lee et al. only included infertile women up to age 39 and compared them to pregnant  
595 women, which resulted in a smaller sample size of  $n=124$ .<sup>27</sup> Here, in addition to women  
596 of 20-39 years, we also included women of 40-49 years, because these women may  
597 have experienced infertility before and are also within reproductive age; moreover, we  
598 defined the fertile women in two ways, including self-reported fertile women and  
599 pregnant women. Third, our study accounts for additional covariates related to  
600 reproduction that are essential for understanding infertility, such as hormonal  
601 contraception use, menstruation patterns, and possible help from a doctor for fertility  
602 issues; further, our study also examined the difference in infertility status among women  
603 who may have seen a doctor and gotten assistance to become pregnant vs. those who  
604 did not. Fourth, we chose to define fertile women in two sub-groups due to some  
605 limitations in the NHANES survey questions. The main-group or women who self-  
606 reported to be fertile or ever-infertile could include women who have never ‘tried’ to  
607 become pregnant. Therefore, it is possible to include several misclassifications. Thus,  
608 we additionally looked at a sub-group of current pregnant women. There were ten  
609 women who were pregnant but also answered “yes” to the question of "Have you ever  
610 attempted to become pregnant over a period of at least a year without becoming  
611 pregnant?" We chose to include these ten women in the ever-infertile group because  
612 they reported having had issues with their fertility in the past. Indeed, five of those ten  
613 women responded that they had previously seen a doctor because they were unable to  
614 become pregnant, indicating that these women likely have received ART such as IVF to

615 become pregnant. Lastly, this study takes a unique approach to assessing the  
616 reproductive toxicity of the mixture of heavy metals using weighted TEQ values.

617

618 Our study has several limitations due to NAHNES study design, the complexities of  
619 assessing female reproduction and reproductive toxicities of heavy metals. First, there  
620 are limitations due to NHANES study design. NHANES is a cross-sectional study,  
621 therefore casual and temporal relationships cannot be confirmed. Cross-sectional data  
622 are also prone to survival bias. Although women aged 15-19 are still considered of  
623 reproductive age, we did not include them because the study design did not collect  
624 exposure or outcome information in this age group. Additionally, NHANES did not  
625 collect information on some reproductive diseases that also play a role in infertility, such  
626 as endometriosis and PCOS. For example, about 30 to 50% of women with  
627 endometriosis are infertile and PCOS is a leading cause of infertility.<sup>115,116</sup> Moreover, the  
628 NHANES questionnaire only collected historical use of birth control and female  
629 hormones. Second, the reproductive health outcomes are measured using a self-  
630 reported questionnaire. Although self-reported information is useful, various definitions  
631 may affect the prevalence of a measured outcome. With the information collected, we  
632 did our best to define the outcomes (ever-infertile, fertile, pregnant, long-term  
633 amenorrhea, menstruating). However, there are limitations for the definitions we used.  
634 For example, amenorrhea is defined as the absence of menstruation for at least a 90-  
635 day period.<sup>117</sup> However, NHANES only collects information on absence of menstruation  
636 for the past 12 months.<sup>57</sup> Although menopause can also be defined by one year of no  
637 menses, we chose to name our variable long-term amenorrhea because these women

638 self-reported not having menopause. Thus, women categorized with long-term  
639 amenorrhea may have suspected early menopause or POF. Third, male factors account  
640 for approximately 40-50% of all cases of infertility.<sup>118</sup> The NHANES questionnaire only  
641 addressed females. Therefore, male infertility factors were not considered. However,  
642 the relationship between male reproduction and heavy metals has been well studied,  
643 while female reproductive function is lacking.

644  
645 Understanding what blood metal concentrations represent is also worth discussing. A  
646 single measurement of blood metal concentration may not reflect long-term exposure  
647 though some studies suggested that under steady state conditions a single  
648 measurement of blood metal level seems to be acceptable as it can reflect body metal  
649 burden of long-term exposure.<sup>119</sup> Our study assumes women's blood metal  
650 concentrations during the time of the examination were the same as when they  
651 experienced infertility or long-term amenorrhea. However, by study design, there is no  
652 way of knowing temporality. Although the biological half-lives for heavy metals in the  
653 human body are long, the half-lives in blood specifically can be shorter and vary (Hg =  
654 50 days,<sup>120</sup> Cd = 3-4 months for the fast component and 7-16 years for the slow  
655 component,<sup>121-123</sup> Pb = 1-2 months<sup>124</sup>). Blood metal concentrations are used to  
656 represent both recent and chronic exposures.<sup>125,126</sup> However, it is important to note that  
657 the acute exposures can modify blood metal concentrations. For example, eating fish  
658 right before the examination could markedly elevate blood Hg concentrations, however,  
659 someone who has been chronically exposed to Hg, maintains high concentrations in  
660 their blood even after exposure has ended.<sup>127,128</sup> This same concept could be applied to

661 Cd blood concentrations with a participant who smoked before the examination. Our  
662 study assumes that the individual's behavior prior to the examination is consistent to  
663 their daily behaviors. Additionally, those with chronic past exposure are often  
664 underestimated when assessing blood levels because metals like Pb can be stored in  
665 the bone. Therefore, individuals can have a high body burden of Pb but still appear to  
666 have normal Pb concentrations in the blood.<sup>129</sup> Lastly, we used the ER stress, an  
667 important contributing factors of female reproductive dysfunctions, to calculate the  
668 mixture score of heavy metals because the Tox21 program has the screening results of  
669 all three metals available. However, it is possible that heavy metals may compromise  
670 female reproduction through other mechanisms such as DNA damage, oxidative stress,  
671 and epigenetic modification. Thus, an optimized calculation method of heavy metal  
672 mixtures is highly desired.

673

## 674 **Conclusion**

675 In summary, the results of our studies using NHANES 2013-2018 reveal that there are  
676 significant percentages of women having blood heavy metal levels exceeding typical or  
677 normal levels. Moreover, the blood concentrations of single Pb and heavy metal  
678 mixtures are associated with an increase of women's historical infertility. This study  
679 highlights the threat of heavy metal exposure on women's reproductive health and  
680 fertility as well as an urgent unmet need to prevent and reduce heavy metal exposure.

681

682 **Authors' roles:** M. McClam, J. Liu, and S. Xiao conceived of the project, contributed to  
683 the experimental design, data collection and analysis, data interpretation, and

684 manuscript writing. Y. Fan and T. Zhan contributed to the data collection and analysis.  
685 Q. Zhang, DE. Porter, and GI. Scott contributed to the data interpretation and  
686 manuscript writing.

687

688 **Funding and acknowledgments:** This work was supported by the National Institutes of  
689 Health (NIH) K01ES030014, P30ES005022 and UH3ES029073 to S. Xiao,  
690 R01ES032144 to S. Xiao and Q. Zhang, P01ES028942 to GI. Scott, D. Porter, and S.  
691 Xiao, and start-up fund from the Environmental and Occupational Health Sciences  
692 Institute (EOHSI) at Rutgers University to S. Xiao.

693

## 694 **References**

- 695 1. Infertility Workup for the Women's Health Specialist: ACOG Committee Opinion,  
696 Number 781. *Obstet Gynecol.* 2019;133(6):e377-e384.
- 697 2. Organization WH. WHO Fact Sheets of Infertility. [https://www.who.int/news-](https://www.who.int/news-room/fact-sheets/detail/infertility)  
698 [room/fact-sheets/detail/infertility](https://www.who.int/news-room/fact-sheets/detail/infertility). Published 2020. Accessed 2022.
- 699 3. Stephen EH, Chandra A. Updated projections of infertility in the United States:  
700 1995-2025. *Fertil Steril.* 1998;70(1):30-34.
- 701 4. Practice Committee of the American Society for Reproductive M. Effectiveness  
702 and treatment for unexplained infertility. *Fertil Steril.* 2006;86(5 Suppl 1):S111-  
703 114.
- 704 5. Blumenfeld Z. Fertility treatment in women with premature ovarian failure. *Expert*  
705 *Review of Obstetrics & Gynecology.* 2011;6(3):321-330.
- 706 6. Stephen L Corson GM. The national regional advisory council practice survey for  
707 2000. *Fertility and Sterility.* 2002;Volume 77(Issue 3):Pages 448-455.
- 708 7. Homer HA. The Role of Oocyte Quality in Explaining "Unexplained" Infertility.  
709 *Semin Reprod Med.* 2020;38(1):21-28.
- 710 8. Brassard M, AinMelk Y, Baillargeon J-P. Basic Infertility Including Polycystic  
711 Ovary Syndrome. *Medical Clinics of North America.* 2008;92(5):1163-1192.
- 712 9. Bulletti C, Coccia ME, Battistoni S, Borini A. Endometriosis and infertility. *J Assist*  
713 *Reprod Genet.* 2010;27(8):441-447.
- 714 10. Anwar S, Anwar A. Infertility: A review on causes, treatment and management.  
715 *Womens Health Gynecol.* 2016;5:2-5.



- 716 11. Bala R, Singh V, Rajender S, Singh K. Environment, Lifestyle, and Female  
717 Infertility. *Reproductive Sciences*. 2021;28(3):617-638.
- 718 12. Tchounwou PB, Yedjou CG, Patlolla AK, Sutton DJ. Heavy metal toxicity and the  
719 environment. *Exp Suppl*. 2012;101:133-164.
- 720 13. World Health Organization. 10 Chemicals of Public Health Concern.  
721 [https://www.who.int/news-room/photo-story/photo-story-detail/10-chemicals-of-](https://www.who.int/news-room/photo-story/photo-story-detail/10-chemicals-of-public-health-concern)  
722 [public-health-concern](https://www.who.int/news-room/photo-story/photo-story-detail/10-chemicals-of-public-health-concern). Published 2020. Accessed.
- 723 14. U.S. Environmental Protection Agency. Basic Information about Lead Air  
724 Pollution. [https://www.epa.gov/lead-air-pollution/basic-information-about-lead-air-](https://www.epa.gov/lead-air-pollution/basic-information-about-lead-air-pollution#:~:text=At%20the%20national%20level%2C%20major,usually%20found%20near%20lead%20smelters)  
725 [pollution#:~:text=At%20the%20national%20level%2C%20major,usually%20foun-](https://www.epa.gov/lead-air-pollution/basic-information-about-lead-air-pollution#:~:text=At%20the%20national%20level%2C%20major,usually%20found%20near%20lead%20smelters)  
726 [d%20near%20lead%20smelters](https://www.epa.gov/lead-air-pollution/basic-information-about-lead-air-pollution#:~:text=At%20the%20national%20level%2C%20major,usually%20found%20near%20lead%20smelters). Published 2022. Accessed.
- 727 15. U.S. Environmental Protection Agency. Mercury Emissions: The Global Context.  
728 [https://www.epa.gov/international-cooperation/mercury-emissions-global-](https://www.epa.gov/international-cooperation/mercury-emissions-global-context#:~:text=Mercury%20occurs%20naturally%20in%20the,can%20be%20washed%20into%20water)  
729 [context#:~:text=Mercury%20occurs%20naturally%20in%20the,can%20be%20wa-](https://www.epa.gov/international-cooperation/mercury-emissions-global-context#:~:text=Mercury%20occurs%20naturally%20in%20the,can%20be%20washed%20into%20water)  
730 [shed%20into%20water](https://www.epa.gov/international-cooperation/mercury-emissions-global-context#:~:text=Mercury%20occurs%20naturally%20in%20the,can%20be%20washed%20into%20water). Published 2022. Accessed.
- 731 16. He ZL, Yang XE, Stoffella PJ. Trace elements in agroecosystems and impacts on  
732 the environment. *J Trace Elem Med Biol*. 2005;19(2-3):125-140.
- 733 17. Bradl H. *Heavy metals in the environment: origin, interaction and remediation*.  
734 Elsevier; 2005.
- 735 18. Okereafor U, Makhatha M, Mekuto L, Uche-Okereafor N, Sebola T,  
736 Mavumengwana V. Toxic Metal Implications on Agricultural Soils, Plants,  
737 Animals, Aquatic life and Human Health. *Int J Environ Res Public Health*.  
738 2020;17(7).
- 739 19. Neblett MF, Curtis SW, Gerkowicz SA, et al. Examining Reproductive Health  
740 Outcomes in Females Exposed to Polychlorinated Biphenyl and Polybrominated  
741 Biphenyl. *Scientific Reports*. 2020;10(1):3314.
- 742 20. Mendola P, Messer LC, Rappazzo K. Science linking environmental contaminant  
743 exposures with fertility and reproductive health impacts in the adult female.  
744 *Fertility and Sterility*. 2008;89(2, Supplement):e81-e94.
- 745 21. Iavicoli I, Fontana L, Bergamaschi A. The effects of metals as endocrine  
746 disruptors. *J Toxicol Environ Health B Crit Rev*. 2009;12(3):206-223.
- 747 22. Xu G, Liu S, Huang M, Jiang X, Yang M. Cadmium induces apoptosis of human  
748 granulosa cell line KGN via mitochondrial dysfunction-mediated pathways.  
749 *Ecotoxicology and Environmental Safety*. 2021;220:112341.
- 750 23. Johnson MD, Kenney N, Stoica A, et al. Cadmium mimics the in vivo effects of  
751 estrogen in the uterus and mammary gland. *Nat Med*. 2003;9(8):1081-1084.
- 752 24. Martin MB, Reiter R, Pham T, et al. Estrogen-like activity of metals in MCF-7  
753 breast cancer cells. *Endocrinology*. 2003;144(6):2425-2436.
- 754 25. Rami Y, Ebrahimpour K, Maghami M, Shoshtari-Yeganeh B, Kelishadi R. The  
755 Association Between Heavy Metals Exposure and Sex Hormones: a Systematic  
756 Review on Current Evidence. *Biol Trace Elem Res*. 2022;200(8):3491-3510.
- 757 26. Lei HL, Wei HJ, Ho HY, Liao KW, Chien LC. Relationship between risk factors for  
758 infertility in women and lead, cadmium, and arsenic blood levels: a cross-  
759 sectional study from Taiwan. *BMC Public Health*. 2015;15:1220.
- 760 27. Lee S, Min JY, Min KB. Female Infertility Associated with Blood Lead and  
761 Cadmium Levels. *Int J Environ Res Public Health*. 2020;17(5).



- 762 28. Pollack AZ, Schisterman EF, Goldman LR, et al. Cadmium, lead, and mercury in  
763 relation to reproductive hormones and anovulation in premenopausal women.  
764 *Environ Health Perspect.* 2011;119(8):1156-1161.
- 765 29. Cheng Y, Zhang J, Wu T, et al. Reproductive toxicity of acute Cd exposure in  
766 mouse: Resulting in oocyte defects and decreased female fertility. *Toxicology*  
767 *and Applied Pharmacology.* 2019;379:114684.
- 768 30. Ronis MJ, Badger TM, Shema SJ, Roberson PK, Shaikh F. Reproductive toxicity  
769 and growth effects in rats exposed to lead at different periods during  
770 development. *Toxicol Appl Pharmacol.* 1996;136(2):361-371.
- 771 31. Jackson LW, Howards PP, Wactawski-Wende J, Schisterman EF. The  
772 association between cadmium, lead and mercury blood levels and reproductive  
773 hormones among healthy, premenopausal women. *Human Reproduction.*  
774 2011;26(10):2887-2895.
- 775 32. Fernandes Azevedo B, Barros Furieri L, Peçanha FM, et al. Toxic Effects of  
776 Mercury on the Cardiovascular and Central Nervous Systems. *Journal of*  
777 *Biomedicine and Biotechnology.* 2012;2012:949048.
- 778 33. Cobbina SJ, Chen Y, Zhou Z, et al. Toxicity assessment due to sub-chronic  
779 exposure to individual and mixtures of four toxic heavy metals. *Journal of*  
780 *Hazardous Materials.* 2015;294:109-120.
- 781 34. Centers for Disease Control and Prevention. *National Health and Nutrition*  
782 *Examination Survey, 2015–2018: Sample Design and Estimation Procedures.*  
783 2020.
- 784 35. Centers for Disease Control and Prevention. National Health and Nutrition  
785 Examination Survey. <https://www.cdc.gov/nchs/nhanes/index.htm>. Published  
786 2021. Accessed 2021.
- 787 36. Centers for Disease Control and Prevention. *Laboratory Procedure Manual.*  
788 2018.
- 789 37. Centers for Disease Control and Prevention. *Labratory Procedure Manual.* 2016.
- 790 38. Centers for Disease Control and Prevention. *Labratory Procedure Manual.* 2014.
- 791 39. Moon SS. Additive effect of heavy metals on metabolic syndrome in the Korean  
792 population: the Korea National Health and Nutrition Examination Survey  
793 (KNHANES) 2009-2010. *Endocrine.* 2014;46(2):263-271.
- 794 40. Voors AW, Shuman MS, Johnson WD. Additive statistical effects of cadmium and  
795 lead on heart-related disease in a North Carolina autopsy series. *Arch Environ*  
796 *Health.* 1982;37(2):98-102.
- 797 41. United States Environmental Protection Agency. Dioxin and Dioxin-Like  
798 Compounds Toxic Equivalency Information. [https://www.epa.gov/toxics-release-](https://www.epa.gov/toxics-release-inventory-tri-program/dioxin-and-dioxin-compounds-toxic-equivalency-information)  
799 [inventory-tri-program/dioxin-and-dioxin-compounds-toxic-equivalency-](https://www.epa.gov/toxics-release-inventory-tri-program/dioxin-and-dioxin-compounds-toxic-equivalency-information)  
800 [information](https://www.epa.gov/toxics-release-inventory-tri-program/dioxin-and-dioxin-compounds-toxic-equivalency-information). Published 2007. Accessed.
- 801 42. Balali-Mood M, Naseri K, Tahergorabi Z, Khazdair MR, Sadeghi M. Toxic  
802 Mechanisms of Five Heavy Metals: Mercury, Lead, Chromium, Cadmium, and  
803 Arsenic. *Front Pharmacol.* 2021;12:643972.
- 804 43. Rana SVS. Endoplasmic Reticulum Stress Induced by Toxic Elements—a  
805 Review of Recent Developments. *Biological Trace Element Research.*  
806 2020;196(1):10-19.

- 807 44. Gao K, Zhang C, Tian Y, Naeem S, Zhang Y, Qi Y. The role of endoplasmic  
808 reticulum stress in lead (Pb)-induced mitophagy of HEK293 cells. *Toxicol Ind*  
809 *Health*. 2020;36(12):1002-1009.
- 810 45. Liu J, Luo L-f, Wang D-l, et al. Cadmium induces ovarian granulosa cell damage  
811 by activating PERK-eIF2 $\alpha$ -ATF4 through endoplasmic reticulum stress. *Biology*  
812 *of reproduction*. 2018;100(1):292-299.
- 813 46. Zhong Y, Wang B, Hu S, et al. The role of endoplasmic reticulum stress in renal  
814 damage caused by acute mercury chloride poisoning. *J Toxicol Sci*.  
815 2020;45(9):589-598.
- 816 47. Kyathanahalli C, Organ K, Moreci RS, et al. Uterine endoplasmic reticulum  
817 stress-unfolded protein response regulation of gestational length is caspase-3  
818 and -7-dependent. *Proc Natl Acad Sci U S A*. 2015;112(45):14090-14095.
- 819 48. Lin T, Lee JE, Kang JW, Shin HY, Lee JB, Jin DI. Endoplasmic Reticulum (ER)  
820 Stress and Unfolded Protein Response (UPR) in Mammalian Oocyte Maturation  
821 and Preimplantation Embryo Development. *Int J Mol Sci*. 2019;20(2).
- 822 49. Wang C, Zhang S, Ma R, et al. Roles of endoplasmic reticulum stress, apoptosis  
823 and autophagy in 2,2',4,4'-tetrabromodiphenyl ether-induced rat ovarian injury.  
824 *Reprod Toxicol*. 2016;65:187-193.
- 825 50. Harada M, Takahashi N, Azhary JM, Kunitomi C, Fujii T, Osuga Y. Endoplasmic  
826 reticulum stress: a key regulator of the follicular microenvironment in the ovary.  
827 *Mol Hum Reprod*. 2021;27(1).
- 828 51. Kim MT, Huang R, Sedykh A, Wang W, Xia M, Zhu H. Mechanism Profiling of  
829 Hepatotoxicity Caused by Oxidative Stress Using Antioxidant Response Element  
830 Reporter Gene Assay Models and Big Data. *Environmental health perspectives*.  
831 2016;124(5):634-641.
- 832 52. Escher BI, Henneberger L, König M, Schlichting R, Fischer FC. Cytotoxicity  
833 Burst? Differentiating Specific from Nonspecific Effects in Tox21 *in Vitro* Reporter  
834 Gene Assays. *Environmental Health Perspectives*. 2020;128(7):077007.
- 835 53. Williams AJ, Grulke CM, Edwards J, et al. The CompTox Chemistry Dashboard:  
836 a community data resource for environmental chemistry. *Journal of*  
837 *Cheminformatics*. 2017;9(1):61.
- 838 54. Shockley KR. Estimating Potency in High-Throughput Screening Experiments by  
839 Maximizing the Rate of Change in Weighted Shannon Entropy. *Scientific*  
840 *Reports*. 2016;6(1):27897.
- 841 55. Van den Berg M, Birnbaum LS, Denison M, et al. The 2005 World Health  
842 Organization reevaluation of human and Mammalian toxic equivalency factors for  
843 dioxins and dioxin-like compounds. *Toxicol Sci*. 2006;93(2):223-241.
- 844 56. Haws LC, Su SH, Harris M, et al. Development of a refined database of  
845 mammalian relative potency estimates for dioxin-like compounds. *Toxicol Sci*.  
846 2006;89(1):4-30.
- 847 57. Utian WH. The International Menopause menopause-related terminology  
848 definitions. *Climacteric*. 1999;2(4):284-286.
- 849 58. Macaluso M, Wright-Schnapp TJ, Chandra A, et al. A public health focus on  
850 infertility prevention, detection, and management. *Fertility and Sterility*.  
851 2010;93(1):16.e11-16.e10.

- 852 59. Norman RJ, Clark AM. Obesity and reproductive disorders: a review.  
853 *Reproduction, Fertility and Development*. 1998;10(1):55-63.
- 854 60. Soares SR, Melo MA. Cigarette smoking and reproductive function. *Current*  
855 *Opinion in Obstetrics and Gynecology*. 2008;20(3).
- 856 61. Centers for Disease Control and Prevention. Defining Adult Overweight &  
857 Obesity. <https://www.cdc.gov/obesity/adult/defining.html>. Published 2021.  
858 Accessed.
- 859 62. Park JD, Cherrington NJ, Klaassen CD. Intestinal absorption of cadmium is  
860 associated with divalent metal transporter 1 in rats. *Toxicol Sci*. 2002;68(2):288-  
861 294.
- 862 63. Petkus DL, Murray-Kolb LE, Scott SP, Southmayd EA, De Souza MJ. Iron status  
863 at opposite ends of the menstrual function spectrum. *Journal of Trace Elements*  
864 *in Medicine and Biology*. 2019;51:169-175.
- 865 64. Centers for Disease Control and Prevention. Module 4: Variance Estimation.  
866 <https://wwwn.cdc.gov/nchs/nhanes/tutorials/module4.aspx>. Accessed 2.3.22.
- 867 65. SAS® 9.4 [computer program]. Cary, NC: SAS Institute Inc.; 2013.
- 868 66. Centers for Disease Control and Prevention. Module 3: Weighting.  
869 <https://wwwn.cdc.gov/nchs/nhanes/tutorials/module3.aspx>. Published 2022.  
870 Accessed.
- 871 67. Boivin J, Bunting L, Collins JA, Nygren KG. International estimates of infertility  
872 prevalence and treatment-seeking: potential need and demand for infertility  
873 medical care. *Hum Reprod*. 2007;22(6):1506-1512.
- 874 68. Centers for Disease Control and Prevention. Infertility.  
875 <https://www.cdc.gov/nchs/fastats/infertility.htm>. Published 2021. Accessed.
- 876 69. Centers for Disease Control and Prevention. Adult Blood Lead Epidemiology and  
877 Surveillance (ABLES).  
878 [https://www.cdc.gov/niosh/topics/ables/ReferenceBloodLevelsforAdults.html#\\_ftn](https://www.cdc.gov/niosh/topics/ables/ReferenceBloodLevelsforAdults.html#_ftn1)  
879 [1](https://www.cdc.gov/niosh/topics/ables/ReferenceBloodLevelsforAdults.html#_ftn1). Published 2021. Accessed.
- 880 70. Holland MG CD, American College of Occupational and Environmental Medicine  
881 (ACOEM) Task Force on Blood Lead Levels,. ACOEM position statement:  
882 Workplace lead exposure. *JOEM*. 2016;12(58):371-374.
- 883 71. Prevention. CfDca. Cadmium Toxicity: Clinical Assessment - Laboratory Tests.  
884 <https://www.atsdr.cdc.gov/csem/cadmium/Laboratory-Evaluation.html>. Published  
885 2013. Accessed.
- 886 72. Laboratories MC. Cadmium, Blood. [https://www.mayocliniclabs.com/test-](https://www.mayocliniclabs.com/test-catalog/overview/8682#Clinical-and-Interpretive)  
887 [catalog/overview/8682#Clinical-and-Interpretive](https://www.mayocliniclabs.com/test-catalog/overview/8682#Clinical-and-Interpretive). Published 2022. Accessed.
- 888 73. Laboratories. MC. Mercury, Blood. [https://www.mayocliniclabs.com/test-](https://www.mayocliniclabs.com/test-catalog/Clinical+and+Interpretive/8618)  
889 [catalog/Clinical+and+Interpretive/8618](https://www.mayocliniclabs.com/test-catalog/Clinical+and+Interpretive/8618). Published 2022. Accessed.
- 890 74. Zhu F, Chen C, Zhang Y, et al. Elevated blood mercury level has a non-linear  
891 association with infertility in U.S. women: Data from the NHANES 2013-2016.  
892 *Reprod Toxicol*. 2020;91:53-58.
- 893 75. Jarup L, Akesson A. Current status of cadmium as an environmental health  
894 problem. *Toxicol Appl Pharmacol*. 2009;238(3):201-208.
- 895 76. Krajcovicová-Kudládková M, Ursínyová M, Masánová V, Béderová A,  
896 Valachovicová M. Cadmium blood concentrations in relation to nutrition. *Cent Eur*  
897 *J Public Health*. 2006;14(3):126-129.

- 898 77. Al-Saleh I, Shinwari N, Al-Amodi M. Accumulation of Mercury in Ovaries of Mice  
899 After the Application of Skin-lightening Creams. *Biological Trace Element*  
900 *Research*. 2009;131(1):43-54.
- 901 78. Ali I, Penttinen-Damdimopoulou PE, Mäkelä SI, et al. Estrogen-like effects of  
902 cadmium in vivo do not appear to be mediated via the classical estrogen receptor  
903 transcriptional pathway. *Environ Health Perspect*. 2010;118(10):1389-1394.
- 904 79. Dhir V, Dhand P. Toxicological approach in chronic exposure to lead on  
905 reproductive functions in female rats (*rattus norvegicus*). *Toxicol Int*.  
906 2010;17(1):1-7.
- 907 80. Nasiadek M, Danilewicz M, Klimczak M, Stragierowicz J, Kilanowicz A.  
908 Subchronic Exposure to Cadmium Causes Persistent Changes in the  
909 Reproductive System in Female Wistar Rats. *Oxid Med Cell Longev*.  
910 2019;2019:6490820.
- 911 81. Taupeau C, Poupon J, Nomé F, Lefèvre B. Lead accumulation in the mouse  
912 ovary after treatment-induced follicular atresia. *Reproductive Toxicology*.  
913 2001;15(4):385-391.
- 914 82. Hilderbrand DC, Der R, Griffin WT, Fahim MS. Effect of lead acetate on  
915 reproduction. *Am J Obstet Gynecol*. 1973;115(8):1058-1065.
- 916 83. Vermande-Van Eck GJ, Meigs JW. Changes in the Ovary of the Rhesus Monkey  
917 After Chronic Lead Intoxication. *Fertility and Sterility*. 1960;11(2):223-234.
- 918 84. Krieg EF, Feng HA. The relationships between blood lead levels and serum  
919 follicle stimulating hormone and luteinizing hormone in the National Health and  
920 Nutrition Examination Survey 1999–2002. *Reproductive Toxicology*.  
921 2011;32(3):277-285.
- 922 85. Massanyi P, Massanyi M, Madeddu R, Stawarz R, Lukac N. Effects of Cadmium,  
923 Lead, and Mercury on the Structure and Function of Reproductive Organs.  
924 *Toxics*. 2020;8(4).
- 925 86. Massányi P, Uhrín V. Histological changes in the uterus of rabbits after an  
926 administration of cadmium. *Journal of Environmental Science and Health Part A:*  
927 *Environmental Science and Engineering and Toxicology*. 1997;32(5):1459-1466.
- 928 87. Massányi P, Uhrín V, Valent M. Correlation relationship between cadmium  
929 accumulation and histological structures of ovary and uterus in rabbits. *Journal of*  
930 *Environmental Science and Health Part A: Environmental Science and*  
931 *Engineering and Toxicology*. 1997;32(5):1621-1635.
- 932 88. Nad P, Massanyi P, Skalicka M, Korenekova B, Cigankova V, Almasiova V. The  
933 effect of cadmium in combination with zinc and selenium on ovarian structure in  
934 Japanese quails. *J Environ Sci Health A Tox Hazard Subst Environ Eng*.  
935 2007;42(13):2017-2022.
- 936 89. Massanyi P, Lukac N, Uhrin V, et al. Female reproductive toxicology of cadmium.  
937 *Acta Biol Hung*. 2007;58(3):287-299.
- 938 90. Massanyi P, Lukac N, Massanyi M, et al. Effects of Xenobiotics on Animal  
939 Reproduction in Vivo: Microscopical Examination. *Microscopy and Microanalysis*.  
940 2020;26(S1):63-63.
- 941 91. Nna VU, Usman UZ, Ofutet EO, Owu DU. Quercetin exerts preventive,  
942 ameliorative and prophylactic effects on cadmium chloride - induced oxidative



- 943 stress in the uterus and ovaries of female Wistar rats. *Food and Chemical*  
944 *Toxicology*. 2017;102:143-155.
- 945 92. Massanyi P, Bardos L, Oppel K, et al. Distribution of cadmium in selected organs  
946 of mice: effects of cadmium on organ contents of retinoids and beta-carotene.  
947 *Acta Physiol Hung*. 1999;86(2):99-104.
- 948 93. Ruslee SS, Zaid SSM, Bakrin IH, Goh YM, Mustapha NM. Protective effect of  
949 Tualang honey against cadmium-induced morphological abnormalities and  
950 oxidative stress in the ovary of rats. *BMC Complement Med Ther*.  
951 2020;20(1):160.
- 952 94. Wang Y, Wang X, Wang Y, et al. Effect of Cadmium on Cellular Ultrastructure in  
953 Mouse Ovary. *Ultrastruct Pathol*. 2015;39(5):324-328.
- 954 95. Bloom MS, Louis GM, Sundaram R, Kostyniak PJ, Jain J. Associations between  
955 blood metals and fecundity among women residing in New York State. *Reprod*  
956 *Toxicol*. 2011;31(2):158-163.
- 957 96. Buck Louis GM, Sundaram R, Schisterman EF, et al. Heavy metals and couple  
958 fecundity, the LIFE Study. *Chemosphere*. 2012;87(11):1201-1207.
- 959 97. Lafuente A. The hypothalamic-pituitary-gonadal axis is target of cadmium toxicity.  
960 An update of recent studies and potential therapeutic approaches. *Food Chem*  
961 *Toxicol*. 2013;59:395-404.
- 962 98. Lee YM, Chung HW, Jeong K, et al. Association between cadmium and anti-  
963 Mullerian hormone in premenopausal women at particular ages. *Ann Occup*  
964 *Environ Med*. 2018;30:44.
- 965 99. Bjørklund G, Chirumbolo S, Dadar M, et al. Mercury exposure and its effects on  
966 fertility and pregnancy outcome. *Basic Clin Pharmacol Toxicol*. 2019;125(4):317-  
967 327.
- 968 100. Chen YW, Huang CF, Tsai KS, et al. Methylmercury Induces Pancreatic  $\beta$ -Cell  
969 Apoptosis and Dysfunction. *Chemical Research in Toxicology*. 2006;19(8):1080-  
970 1085.
- 971 101. Davis BJ, Price HC, O'Connor RW, Fernando R, Rowland AS, Morgan DL.  
972 Mercury Vapor and Female Reproductive Toxicity. *Toxicological Sciences*.  
973 2001;59(2):291-296.
- 974 102. Ma Y, Zhu M, Miao L, Zhang X, Dong X, Zou X. Mercuric Chloride Induced  
975 Ovarian Oxidative Stress by Suppressing Nrf2-Keap1 Signal Pathway and its  
976 Downstream Genes in Laying Hens. *Biological Trace Element Research*.  
977 2018;185(1):185-196.
- 978 103. Zhu F, Chen C, Zhang Y, et al. Corrigendum to "Elevated blood mercury level  
979 has a non-linear association with infertility in U.S. women: Data from the  
980 NHANES 2013-2016" [Reprod. Toxicol. 91C (2020) 53–58]. *Reproductive*  
981 *Toxicology*. 2020;94:103.
- 982 104. Khan AT, Atkinson A, Graham TC, Thompson SJ, Ali S, Shireen KF. Effects of  
983 inorganic mercury on reproductive performance of mice. *Food and Chemical*  
984 *Toxicology*. 2004;42(4):571-577.
- 985 105. Signes-Pastor AJ, Doherty BT, Romano ME, et al. Prenatal exposure to metal  
986 mixture and sex-specific birth outcomes in the New Hampshire Birth Cohort  
987 Study. *Environ Epidemiol*. 2019;3(5).

- 988 106. Yang Y, Pei X, Jin Y, Wang Y, Zhang C. The roles of endoplasmic reticulum  
989 stress response in female mammalian reproduction. *Cell Tissue Res.*  
990 2016;363(3):589-597.
- 991 107. United States Environmental Protection Agency. Framework for Metals Risk  
992 Assessment [https://www.epa.gov/sites/default/files/2013-09/documents/metals-](https://www.epa.gov/sites/default/files/2013-09/documents/metals-risk-assessment-final.pdf)  
993 [risk-assessment-final.pdf](https://www.epa.gov/sites/default/files/2013-09/documents/metals-risk-assessment-final.pdf). Published 2007. Accessed.
- 994 108. Mihm M, Gangooly S, Muttukrishna S. The normal menstrual cycle in women.  
995 *Animal Reproduction Science.* 2011;124(3):229-236.
- 996 109. Pettersson F, Fries H, Nillius SJ. Epidemiology of secondary amenorrhea. I.  
997 Incidence and prevalence rates. *Am J Obstet Gynecol.* 1973;117(1):80-86.
- 998 110. Bachmann GA, Kemmann E. Prevalence of oligomenorrhea and amenorrhea in a  
999 college population. *Am J Obstet Gynecol.* 1982;144(1):98-102.
- 1000 111. Lindsay TJ, Vitrikas KR. Evaluation and treatment of infertility. *Am Fam*  
1001 *Physician.* 2015;91(5):308-314.
- 1002 112. Achrekar SK, Modi DN, Meherji PK, Patel ZM, Mahale SD. Follicle stimulating  
1003 hormone receptor gene variants in women with primary and secondary  
1004 amenorrhea. *Journal of Assisted Reproduction and Genetics.* 2010;27(6):317-  
1005 326.
- 1006 113. Pollack AZ, Schisterman EF, Goldman LR, et al. Cadmium, Lead, and Mercury in  
1007 Relation to Reproductive Hormones and Anovulation in Premenopausal Women.  
1008 *Environmental Health Perspectives.* 2011;119(8):1156-1161.
- 1009 114. Sweet MG, Schmidt-Dalton TA, Weiss PM, Madsen KP. Evaluation and  
1010 management of abnormal uterine bleeding in premenopausal women. *Am Fam*  
1011 *Physician.* 2012;85(1):35-43.
- 1012 115. Bulletti C, Coccia ME, Battistoni S, Borini A. Endometriosis and infertility. *Journal*  
1013 *of assisted reproduction and genetics.* 2010;27(8):441-447.
- 1014 116. Cunha A, Póvoa AM. Infertility management in women with polycystic ovary  
1015 syndrome: a review. *Porto Biomed J.* 2021;6(1):e116-e116.
- 1016 117. Hoffman BL, Halvorson LM, Schorge JO, Schaffer JI, Hamid C, Corton M.  
1017 *Williams gynecology.* Fourth edition. ed. New York: McGraw-Hill companies;  
1018 2020.
- 1019 118. Kumar N, Singh AK. Trends of male factor infertility, an important cause of  
1020 infertility: A review of literature. *Journal of human reproductive sciences.*  
1021 2015;8(4):191-196.
- 1022 119. Becker K, Kaus S, Krause C, et al. German Environmental Survey 1998 (GerES  
1023 III): environmental pollutants in blood of the German population. *Int J Hyg*  
1024 *Environ Health.* 2002;205(4):297-308.
- 1025 120. Sherlock J, Hislop J, Newton D, Topping G, Whittle K. Elevation of mercury in  
1026 human blood from controlled chronic ingestion of methylmercury in fish. *Hum*  
1027 *Toxicol.* 1984;3(2):117-131.
- 1028 121. Järup L, Rogenfelt A, Elinder CG, Nogawa K, Kjellström T. Biological half-time of  
1029 cadmium in the blood of workers after cessation of exposure. *Scand J Work*  
1030 *Environ Health.* 1983;9(4):327-331.
- 1031 122. Nordberg GF, Fowler BA. Chapter Eight - Examples of Risk Assessments of  
1032 Human Metal Exposures and the Need for Mode of Action (MOA), Toxicokinetic-  
1033 Toxicodynamic (TKTD) Modeling, and Adverse Outcome Pathways (AOPs). In:

- 1034 Nordberg GF, Fowler BA, eds. *Risk Assessment for Human Metal Exposures*.  
1035 Academic Press; 2019:227-310.
- 1036 123. Järup L, Rogenfelt A, Elinder C-G, Nogawa K, Kjellström T. Biological half-time of  
1037 cadmium in the blood of workers after cessation of exposure. *Scandinavian*  
1038 *Journal of Work, Environment & Health*. 1983;9(4):327-331.
- 1039 124. Centers for Disease Control and Prevention. Biomonitoring Summary.  
1040 [https://www.cdc.gov/biomonitoring/Lead\\_BiomonitoringSummary.html](https://www.cdc.gov/biomonitoring/Lead_BiomonitoringSummary.html). Published  
1041 2017. Accessed2022.
- 1042 125. Amzal B, Julin B, Vahter M, Wolk A, Johanson G, Åkesson A. Population  
1043 Toxicokinetic Modeling of Cadmium for Health Risk Assessment. *Environmental*  
1044 *Health Perspectives*. 2009;117(8):1293-1301.
- 1045 126. Centers for Disease Control and Prevention. Biomonitoring Summary.  
1046 [https://www.cdc.gov/biomonitoring/Lead\\_BiomonitoringSummary.html](https://www.cdc.gov/biomonitoring/Lead_BiomonitoringSummary.html). Published  
1047 2017. Accessed2021.
- 1048 127. Lindstedt G, Gottberg I, Holmgren B, Jonsson T, Karlsson G. Individual mercury  
1049 exposure of chloralkali workers and its relation to blood and urinary mercury  
1050 levels. *Scand J Work Environ Health*. 1979;5(1):59-69.
- 1051 128. Ye BJ, Kim BG, Jeon MJ, et al. Evaluation of mercury exposure level, clinical  
1052 diagnosis and treatment for mercury intoxication. *Ann Occup Environ Med*.  
1053 2016;28:5.
- 1054 129. ATSDR Agency for Toxic Substances and Disease Registry. Lead Toxicity:  
1055 Clinical Assessment - Diagnostic Tests and Imaging.  
1056 [https://www.atsdr.cdc.gov/csem/leadtoxicity/diagnostic\\_testing.html](https://www.atsdr.cdc.gov/csem/leadtoxicity/diagnostic_testing.html). Published  
1057 2019. Accessed2021.
- 1058

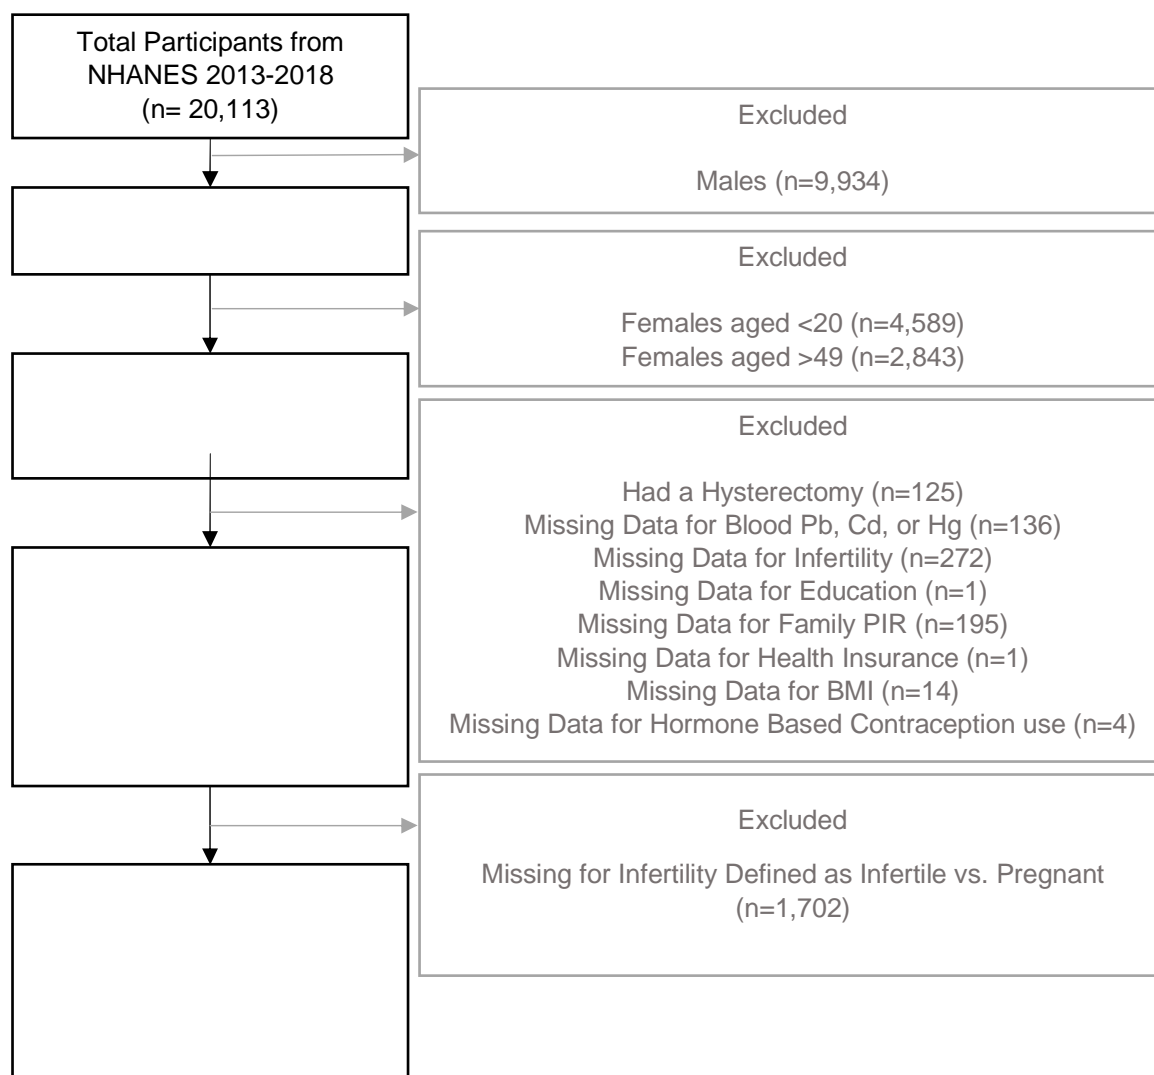

**Figure 1:** Schematic diagram depicting the process of inclusion of women from NHANES 2013–2018 for investigating associations between blood heavy metal concentrations and women’s fertility.



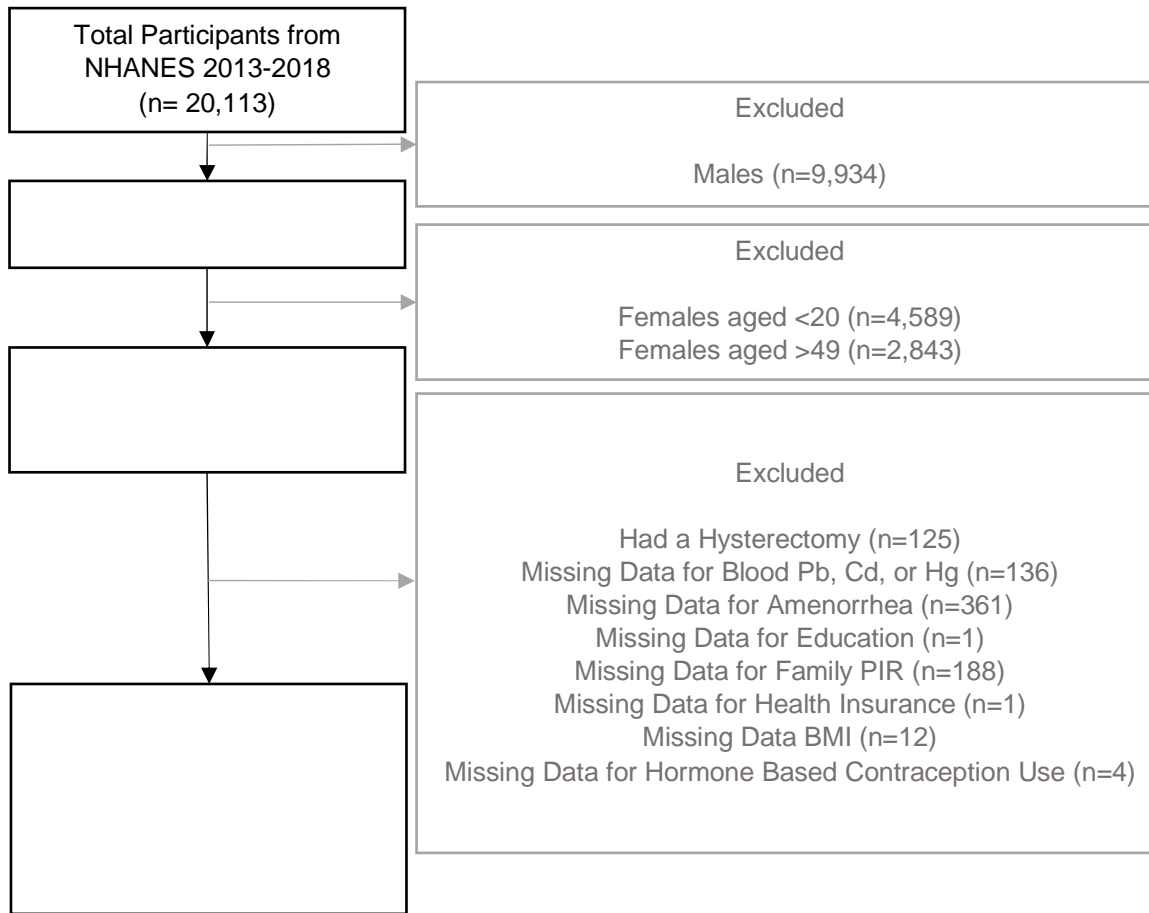

**Figure 2:** Schematic diagram depicting the process of inclusion of women from NHANES 2013–2018 for investigating associations between blood heavy metal concentrations and women’s long-term amenorrhea.

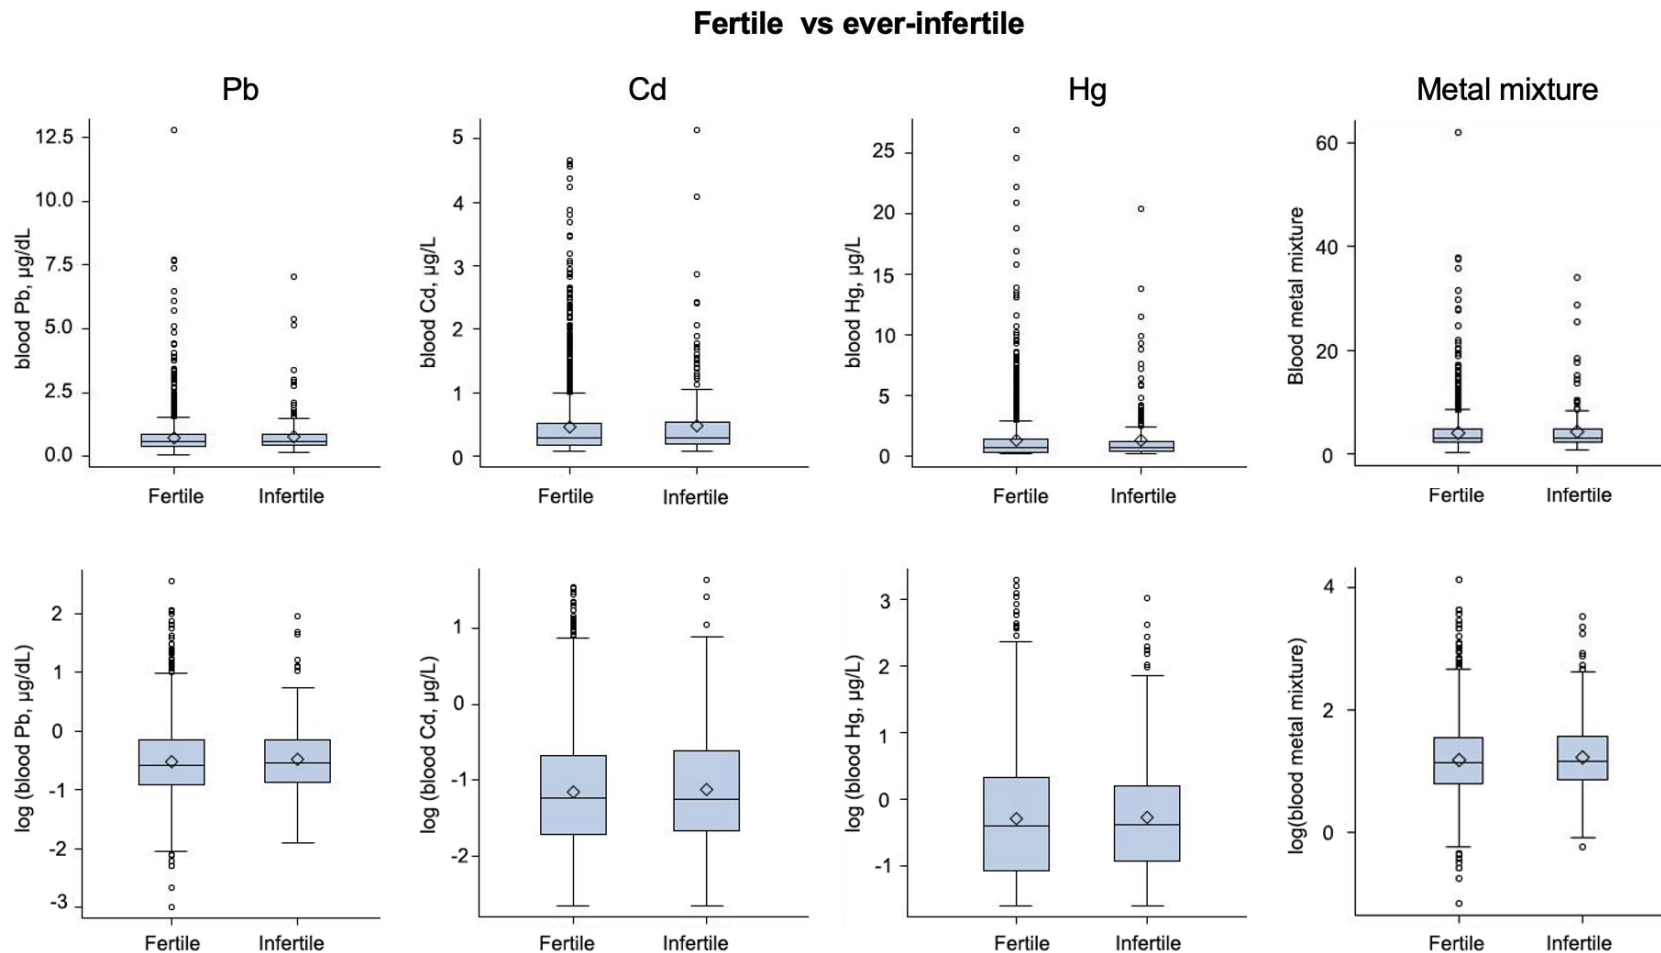

**Figure 3:** The original and log-transformed blood heavy metal concentrations and heavy metal mixture scores in women for the main-group (ever-infertile and fertile) comparison. Each box plot includes the lower (25%) and upper (75%) quartile, median (string), and mean (diamond dot). These results are un-weighted.

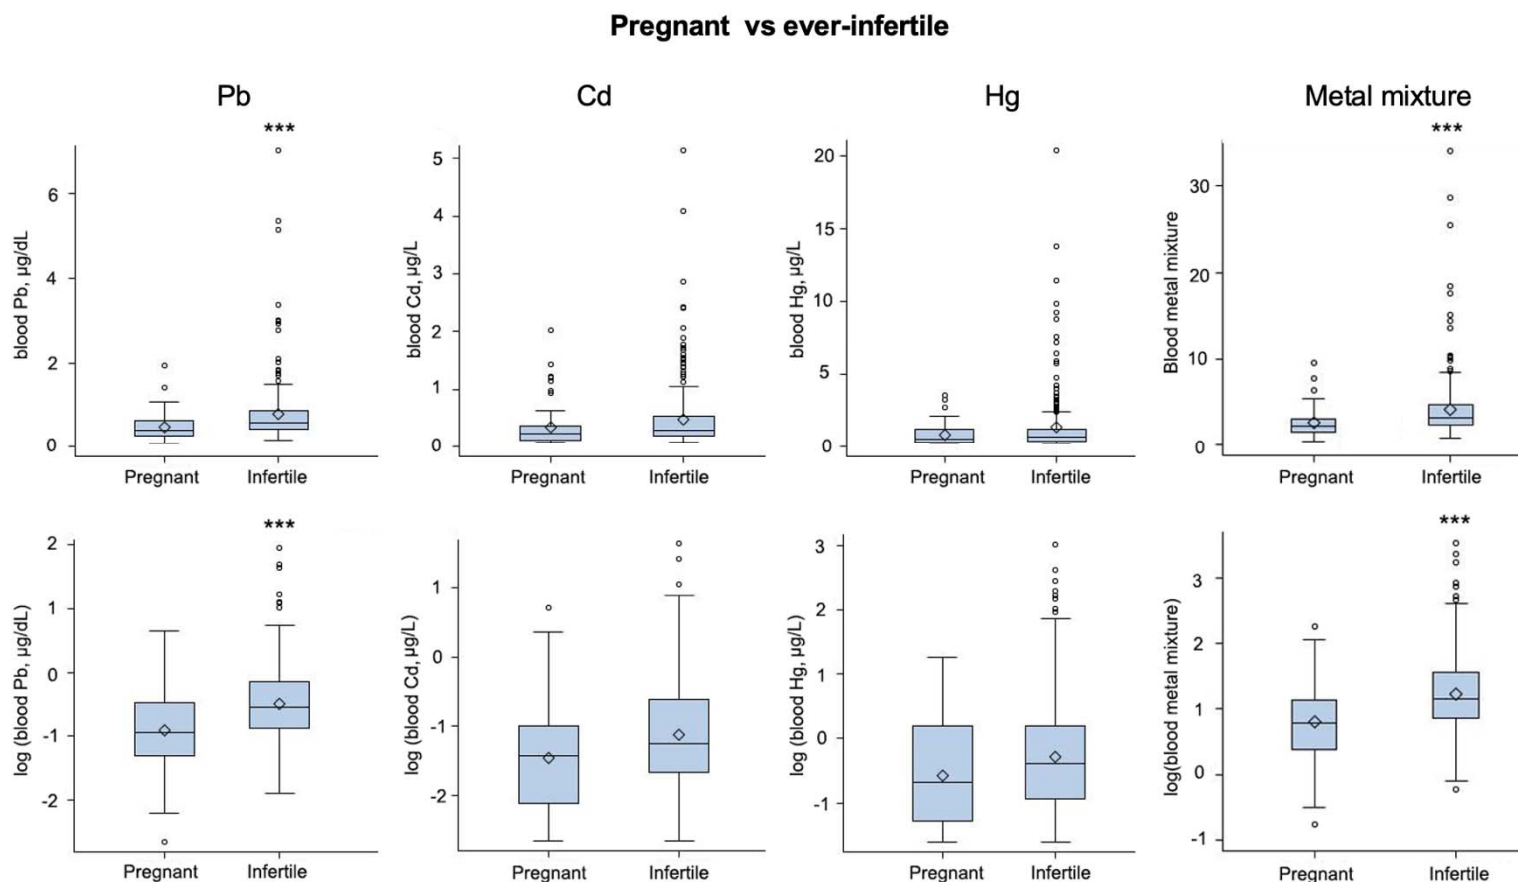

**Figure 4:** The blood heavy metal distributions among the sub-group (pregnant and ever-infertile) samples. These results are un-weighted. The original and log-transformed blood heavy metal concentrations and heavy metal mixture scores in women for the sub-group (pregnant and fertile) comparison. Each box plot includes the lower (25%) and upper (75%) quartile, median (string), and mean (diamond dot). These results are un-weighted. \*\*\* $p < 0.001$ .

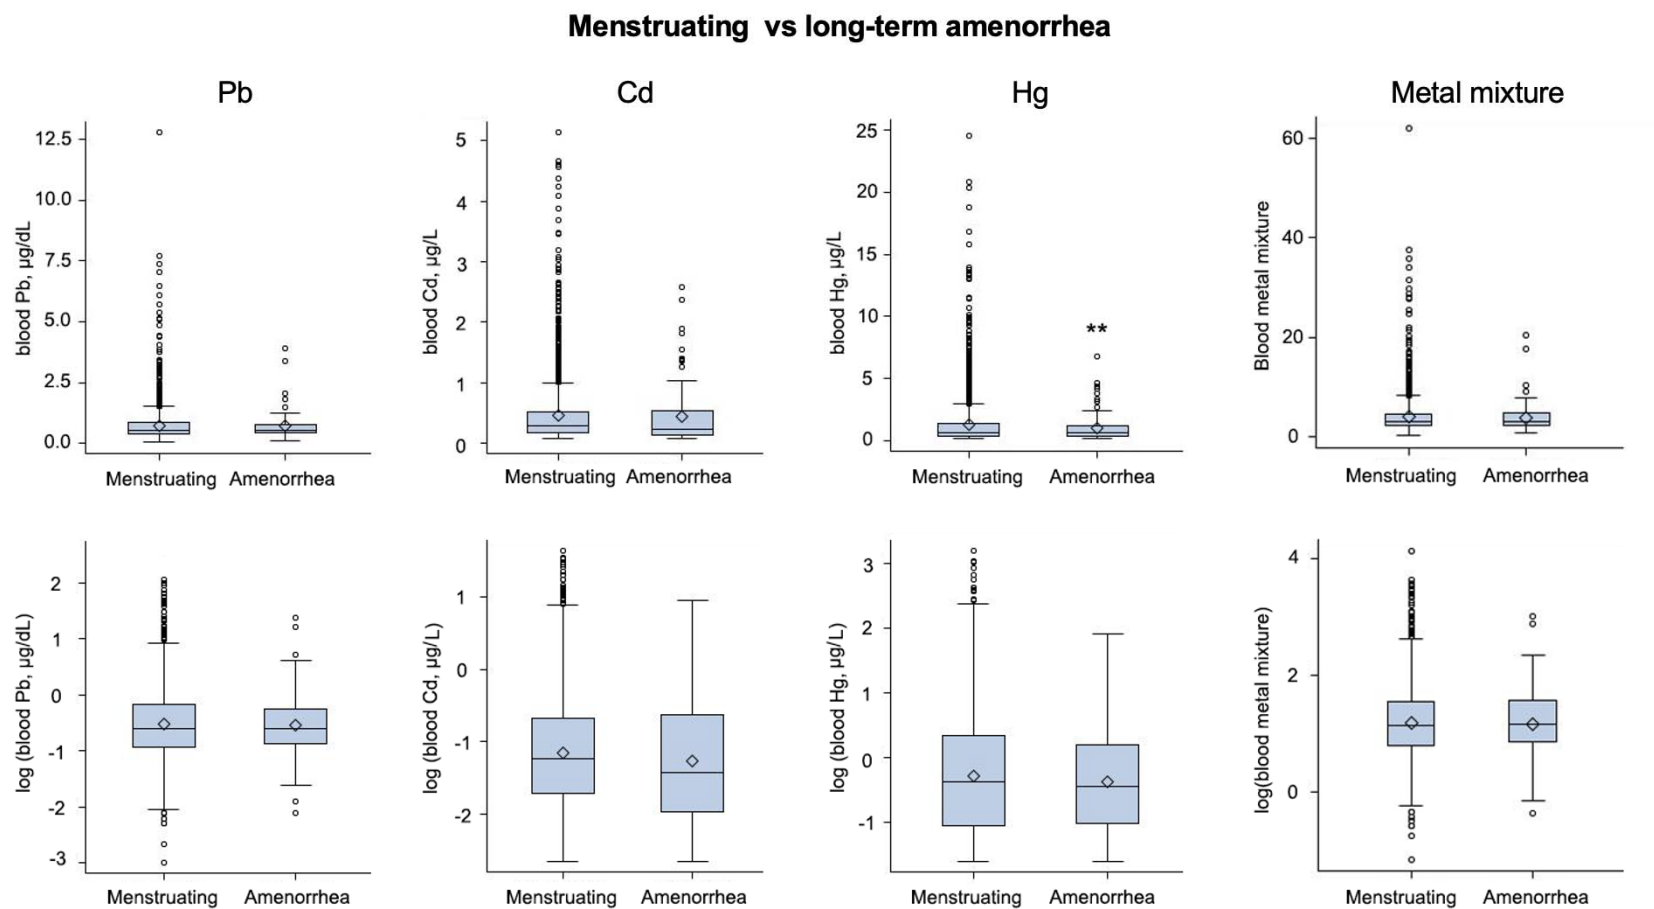

**Figure 5:** The original and log-transformed blood heavy metal concentrations and heavy metal mixture scores in women with normal menstruation and long-term amenorrhea. Each box plot includes the lower (25%) and upper (75%) quartile, median (string), and mean (diamond dot). These results are un-weighted.

**Table 1:** Women’s characteristics for studying associations between blood heavy metal concentrations and historical infertility

| Characteristics                        | Main group sample (ever-infertile vs fertile) |                                   |                            |                      | Sub-group sample (ever-infertile vs pregnant) |                                   |                             |                      |
|----------------------------------------|-----------------------------------------------|-----------------------------------|----------------------------|----------------------|-----------------------------------------------|-----------------------------------|-----------------------------|----------------------|
|                                        | Total Sample N (%)                            | Ever-infertile <sup>1</sup> N (%) | Fertile <sup>2</sup> N (%) | p-Value <sup>4</sup> | Total Sample N (%)                            | Ever-infertile <sup>1</sup> N (%) | Pregnant <sup>3</sup> N (%) | p-Value <sup>4</sup> |
| Total Subjects                         | 1999                                          | 238 (12.8)                        | 1761 (87.2)                |                      | 297                                           | 238 (81.6)                        | 59 (18.4)                   |                      |
| Age, <i>mean ± SE</i> (years)          | 34 ± 0.23                                     | 37 ± 0.79                         | 33 ± 0.22                  | <.001                | 35 ± 0.71                                     | 37 ± 0.70                         | 27 ± 0.58                   | <.001                |
| Race/Ethnicity                         |                                               |                                   |                            | 0.85                 |                                               |                                   |                             | 0.26                 |
| Hispanic                               | 518 (18.2)                                    | 62 (17.9)                         | 456 (18.2)                 |                      | 78 (18.5)                                     | 62 (17.9)                         | 16 (21.4)                   |                      |
| Non-Hispanic White                     | 697 (58.4)                                    | 90 (60.5)                         | 607 (58.1)                 |                      | 108 (57.8)                                    | 90 (60.5)                         | 18 (45.8)                   |                      |
| Non-Hispanic Black                     | 426 (13.2)                                    | 47 (13.0)                         | 379 (13.2)                 |                      | 61 (14.4)                                     | 47 (13.0)                         | 14 (20.4)                   |                      |
| Other Race Including Multi-Racial      | 358 (10.2)                                    | 39 (8.6)                          | 319 (10.5)                 |                      | 50 (9.3)                                      | 39 (8.6)                          | 11 (12.4)                   |                      |
| Education Level                        |                                               |                                   |                            | 0.53                 |                                               |                                   |                             | 0.73                 |
| Less than High School                  | 297 (10.8)                                    | 36 (11.7)                         | 261 (10.7)                 |                      | 46 (15.5)                                     | 36 (11.7)                         | 10 (14.1)                   |                      |
| High School                            | 397 (19.6)                                    | 50 (22.1)                         | 347 (19.2)                 |                      | 62 (20.9)                                     | 50 (22.1)                         | 12 (17.1)                   |                      |
| More than High School                  | 1305 (69.6)                                   | 152 (66.3)                        | 1153 (70.1)                |                      | 189 (63.6)                                    | 152 (66.3)                        | 37 (68.8)                   |                      |
| Marital Status                         |                                               |                                   |                            | <.001                |                                               |                                   |                             | 0.59                 |
| Married / Living with Partner          | 1173 (61.3)                                   | 175 (78.1)                        | 998 (58.9)                 |                      | 223 (78.6)                                    | 175 (78.1)                        | 48 (80.6)                   |                      |
| Divorced / Widowed / Separated         | 243 (10.3)                                    | 29 (8.8)                          | 214 (10.5)                 |                      | 31 (8.0)                                      | 29 (8.8)                          | 2 (4.2)                     |                      |
| Never Married                          | 583 (28.4)                                    | 34 (13.0)                         | 549 (30.6)                 |                      | 43 (13.4)                                     | 34 (13.0)                         | 9 (15.2)                    |                      |
| Poverty Income Ratio, <i>mean ± SE</i> | 2.770 ± 0.07                                  | 2.95 ± 0.14                       | 2.75 ± 0.070               | 0.15                 | 2.90 ± 0.14                                   | 2.95 ± 0.14                       | 2.72 ± 0.23                 | 0.52                 |
| Covered by Health Insurance            |                                               |                                   |                            | 0.33                 |                                               |                                   |                             | 0.03                 |

|                                          |             |            |             |            |            |           |       |
|------------------------------------------|-------------|------------|-------------|------------|------------|-----------|-------|
| Yes                                      | 1601 (83.0) | 187 (80.7) | 1414 (83.3) | 239 (82.6) | 187 (80.7) | 52 (91.0) |       |
| No                                       | 398 (17.0)  | 51 (19.3)  | 347 (16.7)  | 58 (17.4)  | 51 (19.3)  | 7 (9.0)   |       |
| Body Mass Index (kg/m**2)                |             |            |             | 0.007      |            |           | 0.16  |
| Underweight (<18.5)                      | 39 (2.0)    | 4 (1.2)    | 35 (2.1)    | 5 (1.2)    | 4 (1.2)    | 1 (1.4)   |       |
| Normal Weight (18.5-24.9)                | 615 (32.1)  | 64 (27.8)  | 551 (32.7)  | 78 (26.2)  | 64 (27.8)  | 14 (19.2) |       |
| Overweight (25.0-29.9)                   | 471 (24.9)  | 38 (18.5)  | 433 (25.9)  | 53 (21.1)  | 38 (18.5)  | 15 (32.4) |       |
| Obesity (>30)                            | 874 (50.0)  | 132 (52.5) | 742 (39.3)  | 161 (51.5) | 132 (52.5) | 29 (47.0) |       |
| Ever Smoked                              |             |            |             | 0.028      |            |           | 0.50  |
| Yes                                      | 613 (33.0)  | 88 (40.5)  | 525 (31.9)  | 109 (39.3) | 88 (40.5)  | 21 (34.1) |       |
| No                                       | 1386 (67.0) | 150 (59.5) | 1236 (68.1) | 188 (60.7) | 150 (59.5) | 38 (65.9) |       |
| Ever taken hormone-based contraception?  |             |            |             | 0.85       |            |           | 0.15  |
| Yes                                      | 1389 (75.7) | 170 (76.3) | 1219 (75.6) | 204 (74.3) | 170 (76.3) | 34 (65.1) |       |
| No                                       | 610 (24.3)  | 68 (23.7)  | 542 (24.4)  | 93 (25.7)  | 68 (23.7)  | 25 (34.9) |       |
| At least one period in past 12 months    |             |            |             | 0.73       |            |           | n/a   |
| Yes                                      | 1815 (89.8) | 222 (89.0) | 1593 (89.9) | 281 (91.0) | 222 (89.0) | 59 (100)  |       |
| No                                       | 183 (10.2)  | 16 (11.0)  | 167 (10.1)  | 16 (9.0)   | 16 (11.0)  | 0 (0)     |       |
| Seen a DR b/c unable to become pregnant? |             |            |             | <.001      |            |           | <.001 |
| Yes                                      | 166 (9.3)   | 136 (60.3) | 30 (1.8)    | 137 (49.5) | 136 (60.3) | 1 (1.9)   |       |
| No                                       | 1833 (90.7) | 102 (39.7) | 1731 (98.2) | 160 (50.5) | 102 (39.7) | 58 (98.1) |       |

Values for continuous variables are mean +/- SD.

Values for categorical variables are n (unweighted sample counts) and % (weighted sample percentages to account for NHANES survey design).

<sup>1</sup> 'Ever-infertile' if subject responded 'yes' to the following question: "Have you ever attempted to become pregnant over a period of at least a year without becoming pregnant?"

<sup>2</sup> 'Fertile' if answered "No" to the following question: "Have you ever attempted to become pregnant over a period of at least a year without becoming pregnant?"

<sup>3</sup> 'Pregnant' if women answered "Yes" to the question "Are you pregnant now?"

<sup>4</sup>  $p$ -Value for categorical variables comes from a chi-squared test, which determines if there is a significant difference between demographics in ever infertile vs. fertile or pregnant.  $p$ -values for continuous variables comes from a t-test to determine if there is a significant difference between the means of ever infertile vs. fertile or pregnant.



**Table 2:** Medians and log transformed means of blood heavy metal concentrations and heavy metal mixture scores in ever-infertile or fertile/pregnant women

| Metal                                    | <u>Main group sample (ever-infertile vs fertile n=1999)</u> |                             |                       |                      | <u>Sub-group sample (ever-infertile vs pregnant n=297)</u> |                             |                       |                      |
|------------------------------------------|-------------------------------------------------------------|-----------------------------|-----------------------|----------------------|------------------------------------------------------------|-----------------------------|-----------------------|----------------------|
|                                          | Total Sample                                                | Ever-infertile <sup>1</sup> | Fertile <sup>2</sup>  | p-Value <sup>4</sup> | Total Sample -                                             | Ever-infertile <sup>1</sup> | Pregnant <sup>3</sup> | p-Value <sup>4</sup> |
| Lead, <i>median, IQR</i> (ug / dL)       | 0.53<br>(0.34 - 0.78)                                       | 0.56<br>(0.42 - 0.79)       | 0.53<br>(0.38 - 0.78) | 0.19                 | 0.54<br>(0.36 - 0.74)                                      | 0.56<br>(0.42 - 0.79)       | 0.36<br>(0.26 - 0.53) | 0.001                |
| Log Transformed Lead, <i>Mean, SE</i>    | -0.57 ± 0.02                                                | -0.49 ± 0.04                | -0.58 ± 0.03          | 0.11                 | -0.58 ± 0.05                                               | -0.49 ± 0.04                | -0.99 ± 0.06          | <.001                |
| Cadmium, <i>median, IQR</i> (ug / L)     | 0.25<br>(0.16 - 0.44)                                       | 0.26<br>(0.15 - 0.47)       | 0.25<br>(0.60 - 0.44) | 0.68                 | 0.25<br>(0.14 - 0.44)                                      | 0.26<br>(0.15 - 0.47)       | 0.19<br>(0.11 - 0.35) | 0.21                 |
| Log Transformed Cadmium, <i>Mean, SE</i> | -1.25 ± 0.03                                                | -1.24 ± 0.07                | -1.25 ± 0.03          | 0.91                 | -1.30 ± 0.07                                               | -1.24 ± 0.07                | -1.54 ± 0.10          | 0.07                 |
| Mercury, <i>median, IQR</i> (ug / L)     | 0.61<br>(0.33 - 1.26)                                       | 0.60<br>(0.37 - 1.15)       | 0.61<br>(0.32 - 1.27) | 0.72                 | 0.59<br>(0.35 - 1.16)                                      | 0.60<br>(0.37 - 1.15)       | 0.55<br>(0.26 - 1.14) | 0.051                |
| Log Transformed Mercury, <i>Mean, SE</i> | -0.37 ± 0.03                                                | -0.36 ± 0.08                | -0.37 ± 0.03          | 0.89                 | -0.40 ± 0.07                                               | -0.36 ± 0.08                | -0.58 ± 0.12          | 0.21                 |
| Mixed Metal, <i>median, IQR</i>          | 3.01<br>(2.12 – 4.39)                                       | 3.10<br>(2.27 – 4.31)       | 2.10<br>(2.98 – 4.39) | 0.19                 | 2.94<br>(2.03 – 4.23)                                      | 3.10<br>(2.27 – 4.31)       | 1.39<br>(2.04 – 2.79) | 0.001                |
| Log Transformed Mix, <i>Mean, SE</i>     | 1.14 ± 0.02                                                 | 1.21 ± 0.04                 | 1.13 ± 0.02           | 0.15                 | 1.12 ± 0.04                                                | 1.21 ± 0.04                 | 0.73 ± 0.06           | <.001                |

Blood metal distributions were skewed. Therefore, we presented the median and IQR (25<sup>th</sup> and 75<sup>th</sup> percentile) and the mean of the Log Transformed blood heavy metal levels. These results are weighted to account for NHANES survey design.

- <sup>1</sup> 'Ever-infertile' if subject responded 'yes' to the following question: "Have you ever attempted to become pregnant over a period of at least a year without becoming pregnant?"
- <sup>2</sup> 'Fertile' if answered "No" to the following question: "Have you ever attempted to become pregnant over a period of at least a year without becoming pregnant?"
- <sup>3</sup> 'Pregnant' if women answered "Yes" to the question "Are you pregnant now?"
- <sup>4</sup> *p*-values represent a t-test to determine if there is a significant difference between the means of ever-infertile vs. fertile or pregnant.

**Table 3:** Associations between blood heavy metal concentrations and heavy metal mixture scores and women’s infertility

| Characteristics               | Total N (%) <sup>1</sup> | Main group sample (ever infertile <sup>2</sup> vs fertile <sup>3</sup><br>n=1999) |                                 |                               |                                        | Sub-group sample (ever-infertile <sup>2</sup> vs pregnant <sup>4</sup><br>n=297) |                                 |                               |                                        |
|-------------------------------|--------------------------|-----------------------------------------------------------------------------------|---------------------------------|-------------------------------|----------------------------------------|----------------------------------------------------------------------------------|---------------------------------|-------------------------------|----------------------------------------|
|                               |                          | Ever-infertile <sup>2</sup><br>n (%) or<br>Mean (SD) <sup>1</sup>                 | Crude OR<br>(95% CI)<br>Model 1 | Adj OR<br>(95% CI)<br>Model 2 | Fully Adj<br>OR (95%<br>CI)<br>Model 3 | Ever-infertile <sup>2</sup><br>n (%) or<br>Mean (SD) <sup>1</sup>                | Crude OR<br>(95% CI)<br>Model 1 | Adj OR<br>(95% CI)<br>Model 2 | Fully Adj<br>OR (95%<br>CI)<br>Model 3 |
| <b>LEAD</b>                   |                          |                                                                                   |                                 |                               |                                        |                                                                                  |                                 |                               |                                        |
| Log Transformed,<br>Mean (SD) | -0.52<br>(0.62)          | -0.48 (0.61)                                                                      | 1.28 (0.97<br>- 1.68)           | 1.69<br>(1.01 -<br>2.85)*     | 1.75 (1.02 -<br>3.02)*                 | -0.48 (0.61)                                                                     | 5.02 (2.73<br>- 9.23)*          | 5.19 (2.14 -<br>12.59)*       | 3.09 (1.22 -<br>7.85)*                 |
| Lead quartiles, n<br>(%)      |                          |                                                                                   |                                 |                               |                                        |                                                                                  |                                 |                               |                                        |
| Q1 (Ref) (≤0.40)              | 488<br>(24.41%)          | 52 (2.6%)                                                                         | Ref                             | Ref                           | Ref                                    | 52 (17.51%)                                                                      | Ref                             | Ref                           | Ref                                    |
| Q2 (0.41 – 0.56)              | 492<br>(24.61%)          | 56 (2.8%)                                                                         | 1.15 (0.70<br>- 1.89)           | 1.37<br>(0.67 -<br>2.80)      | 1.38 (0.68 -<br>2.79)                  | 56 (18.86%)                                                                      | 3.23 (1.18<br>- 8.86)*          | 2.88 (0.61 -<br>13.55)        | 2.52 (0.53 -<br>12.09)                 |
| Q3 (0.57 – 0.86)              | 513<br>(25.66%)          | 70 (3.5%)                                                                         | 1.52 (1.00<br>- 2.29)*          | 1.60<br>(0.82 -<br>3.10)      | 1.61 (0.83 -<br>3.09)                  | 70 (23.57%)                                                                      | 5.32 (2.20<br>- 12.88)*         | 5.60 (1.67 -<br>18.73)*       | 3.47 (1.11 -<br>10.83)*                |
| Q4 (>0.86)                    | 506<br>(25.31)           | 60 (3.0%)                                                                         | 1.30 (0.80<br>- 2.11)           | 1.71<br>(0.76 -<br>3.85)      | 1.72 (0.75 -<br>3.95)                  | 60 (20.2%)                                                                       | 6.71 (2.85<br>- 15.81)*         | 12.62 (2.48<br>- 64.21)*      | 5.26 (1.18 -<br>23.54)*                |
| <b>CADMIUM</b>                |                          |                                                                                   |                                 |                               |                                        |                                                                                  |                                 |                               |                                        |

|                               |                 |              |                       |                          |                       |              |                       |                        |                       |
|-------------------------------|-----------------|--------------|-----------------------|--------------------------|-----------------------|--------------|-----------------------|------------------------|-----------------------|
| Log Transformed,<br>Mean (SD) | -1.16<br>(0.84) | -1.13 (0.84) | 1.01 (0.81<br>- 1.26) | 1.01<br>(0.68 -<br>1.52) | 0.94 (0.63 -<br>1.41) | -1.13 (0.84) | 1.51 (0.94<br>- 2.43) | 2.29 (0.87 -<br>6.04)  | 1.90 (0.64 -<br>5.63) |
| Cadmium quartiles,<br>n (%)   |                 |              |                       |                          |                       |              |                       |                        |                       |
| Q1 (Ref) ( $\leq 0.18$ )      | 469<br>(23.46%) | 52 (2.6%)    | Ref                   | Ref                      | Ref                   | 52 (17.51%)  | Ref                   | Ref                    | Ref                   |
| Q2 (0.19 – 0.29)              | 509<br>(25.46%) | 67 (3.35%)   | 1.08 (0.66<br>- 1.77) | 0.65<br>(0.34 -<br>1.25) | 0.67 (0.35 -<br>1.27) | 67 (22.56%)  | 2.06 (0.81<br>- 5.27) | 0.82 (0.16 -<br>4.05)  | 0.58 (0.10 -<br>3.41) |
| Q3 (0.30-0.51)                | 513<br>(25.66%) | 53 (2.65%)   | 0.87 (0.57<br>- 1.32) | 0.71<br>(0.38 -<br>1.33) | 0.70 (0.37 -<br>1.31) | 53 (17.85%)  | 1.83 (0.76<br>- 4.41) | 0.38 (0.05 -<br>2.83)  | 0.37 (0.04 -<br>3.20) |
| Q4 (>0.51)                    | 508<br>(25.41%) | 66 (3.3%)    | 1.07 (0.64<br>- 1.81) | 0.95<br>(0.41 -<br>2.18) | 0.83 (0.36 -<br>1.94) | 66 (22.22%)  | 2.19 (0.80<br>- 6.02) | 1.33 (0.09 -<br>19.70) | 0.61 (0.04 -<br>9.94) |
| <b>MERCURY</b>                |                 |              |                       |                          |                       |              |                       |                        |                       |
| Log Transformed,<br>Mean (SD) | -0.29<br>(0.99) | -0.28 (0.96) | 1.01 (0.85<br>- 1.21) | 1.07<br>(0.80 -<br>1.44) | 1.02 (0.76 -<br>1.36) | -0.28 (0.96) | 1.35 (0.84<br>- 2.17) | 1.37 (0.71 -<br>2.67)  | 1.38 (0.76 -<br>2.51) |
| Mercury quartiles, n<br>(%)   |                 |              |                       |                          |                       |              |                       |                        |                       |
| Q1 (Ref) ( $\leq 0.34$ )      | 491<br>(24.56%) | 46 (2.3%)    | Ref                   | Ref                      | Ref                   | 46 (15.49%)  | Ref                   | Ref                    | Ref                   |
| Q2 (0.34 – 0.67)              | 508<br>(25.41%) | 72 (3.6%)    | 1.69 (0.96<br>- 2.97) | 1.70<br>(0.76 -<br>3.81) | 1.59 (0.70 -<br>3.61) | 72 (24.24%)  | 2.54 (0.90<br>- 7.17) | 2.26 (0.47 -<br>10.90) | 1.48 (0.43 -<br>5.03) |

|                            |                 |             |                    |                    |                    |             |                       |                        |                     |
|----------------------------|-----------------|-------------|--------------------|--------------------|--------------------|-------------|-----------------------|------------------------|---------------------|
| Q3 (0.68-1.38)             | 493<br>(24.66%) | 63 (3.15%)  | 1.43 (0.82 - 2.49) | 1.54 (0.75 - 3.18) | 1.49 (0.72 - 3.08) | 63 (21.21%) | 1.91 (0.62 - 5.90)    | 2.53 (0.54 - 11.78)*   | 2.51 (0.60 - 10.59) |
| Q4 (>1.38)                 | 507<br>(25.36%) | 57 (2.85%)  | 1.20 (0.66 - 2.17) | 0.58 (3.66 - 3.11) | 1.26 (0.51 - 3.11) | 57 (19.19%) | 1.90 (0.61 - 5.94)    | 2.01 (0.40 - 10.20)    | 1.67 (0.33 - 8.43)  |
| <b>MIX</b>                 |                 |             |                    |                    |                    |             |                       |                        |                     |
| Log Transformed, Mean (SD) | 1.19 (0.60)     | 1.22 (0.61) | 1.26 (0.94 - 1.69) | 1.69 (0.95 - 2.99) | 1.00 (0.46 - 2.19) | 1.22 (0.61) | 4.60 (2.42 - 8.76)*   | 6.21 (2.24 - 17.20) *  | 1.30 (0.09 - 18.13) |
| Mix quartiles, n (%)       |                 |             |                    |                    |                    |             |                       |                        |                     |
| Q1 (Ref) ( $\leq 2.24$ )   | 499<br>(24.96%) | 53 (2.65%)  | Ref                | Ref                | Ref                | 53 (17.85%) | Ref                   | Ref                    | Ref                 |
| Q2 (2.24-3.14)             | 500<br>(25.01%) | 65 (3.25%)  | 1.34 (0.91 - 1.99) | 1.58 (0.86 - 2.91) | 1.47 (0.80 - 2.71) | 65 (21.89%) | 2.66 (1.33 - 5.32) *  | 1.86 (0.53 - 6.47)     | 0.87 (0.18 - 4.30)  |
| Q3 (3.14-4.74)             | 500<br>(25.01%) | 59 (2.95%)  | 1.39 (0.90 - 2.15) | 1.31 (0.65 - 2.63) | 1.12 (0.56 - 2.25) | 59 (19.87%) | 9.62 (2.74 - 33.80) * | 15.87 (3.11 - 80.91) * | 6.92 (0.72 - 66.79) |
| Q4 (>4.74)                 | 500<br>(25.01%) | 61 (3.05%)  | 1.29 (0.82 - 2.05) | 2.02 (0.89 - 4.75) | 1.17 (0.44 - 3.10) | 61 (20.54%) | 4.80 (1.77 - 13.03) * | 13.22 (2.39 - 73.17) * | 0.48 (0.01 - 16.32) |

\* Statistically significant and corresponding  $p$ -value  $< 0.05$

<sup>1</sup> Values are unweighted sample counts and percentages.

<sup>2</sup> 'Ever infertile' if subject responded 'yes' to the following question: "Have you ever attempted to become pregnant over a period of at least a year without becoming pregnant?"

<sup>3</sup> 'Fertile' if answered "No" to the following question: "Have you ever attempted to become pregnant over a period of at least a year without becoming pregnant?"

<sup>4</sup> 'Pregnant' if women answered "Yes" to the question "Are you pregnant now?"

**Table 4:** Association between women’s infertility and recent long-term amenorrhea

|                                                         | <b>Amenorrhea</b> | <b>Menstruating</b> | <b>Total</b> | <b>% of women with amenorrhea by infertility status</b> | <b>p-value</b> |
|---------------------------------------------------------|-------------------|---------------------|--------------|---------------------------------------------------------|----------------|
| <b>Infertile</b>                                        | 9                 | 222                 | 231          | 3.9%                                                    | 0.29           |
| <b>Fertile</b>                                          | 94                | 1593                | 1687         | 5.6%                                                    |                |
| <b>Total</b>                                            | 103               | 1815                | 1918         |                                                         |                |
| <b>% of women who are infertile by menstrual status</b> | 8.7%              | 12.2%               |              |                                                         |                |



**Table 5:** Women’s characteristics for studying associations between blood heavy metal concentrations and long-term amenorrhea

| Characteristics                        | Total Sample<br>N (%) | Long-term<br>amenorrhea <sup>1</sup><br>N (%) | Menstruating <sup>2</sup><br>N (%) | p-Value <sup>3</sup> |
|----------------------------------------|-----------------------|-----------------------------------------------|------------------------------------|----------------------|
| Total Subjects                         | 1919                  | 103 (6.4)                                     | 1816 (93.6)                        |                      |
| Age, <i>mean ± SE</i> (years)          | 34 ± 0.2              | 35 ± 0.1                                      | 33 ± 0.2                           | 0.24                 |
| Race/Ethnicity                         |                       |                                               |                                    | 0.03                 |
| Hispanic                               | 501 (18.4)            | 23 (11.9)                                     | 478 (18.8)                         |                      |
| Non-Hispanic White                     | 664 (58.0)            | 47 (68.5)                                     | 617 (57.3)                         |                      |
| Non-Hispanic Black                     | 409 (13.4)            | 26 (14.1)                                     | 383 (13.3)                         |                      |
| Other Race Including Multi-Racial      | 345 (10.3)            | 7 (5.6)                                       | 338 (10.6)                         |                      |
| Education Level                        |                       |                                               |                                    | 0.65                 |
| Less than High School                  | 285 (10.7)            | 16 (11.8)                                     | 269 (10.6)                         |                      |
| High School                            | 382 (19.9)            | 27 (23.0)                                     | 355 (19.6)                         |                      |
| More than High School                  | 1252 (69.4)           | 60 (65.3)                                     | 1192 (69.7)                        |                      |
| Marital Status                         |                       |                                               |                                    | 0.77                 |
| Married / Living with Partner          | 1117 (60.8)           | 57 (63.5)                                     | 1060 (60.6)                        |                      |
| Divorced / Widowed / Separated         | 228 (10.1)            | 13 (10.8)                                     | 215 (10.1)                         |                      |
| Never Married                          | 574 (29.1)            | 33 (25.7)                                     | 541 (29.3)                         |                      |
| Covered by Health Insurance            |                       |                                               |                                    | 0.47                 |
| Yes                                    | 1533 (82.5)           | 88 (85.7)                                     | 1445 (82.3)                        |                      |
| No                                     | 386 (17.5)            | 15 (14.3)                                     | 371 (17.7)                         |                      |
| Poverty Income Ratio, <i>mean ± SE</i> | 2.75 ± 0.065          | 2.59 ± 0.189                                  | 2.77 ± 0.067                       | 0.39                 |
| Body Mass Index (kg/m**2)              |                       |                                               |                                    | 0.88                 |
| Underweight (<18.5)                    | 38 (2.1)              | 1 (1.2)                                       | 37 (2.1)                           |                      |

|                                         |             |           |             |      |
|-----------------------------------------|-------------|-----------|-------------|------|
| Normal Weight (18.5-24.9)               | 591 (31.8)  | 34 (31.9) | 557 (31.8)  |      |
| Overweight (25.0-29.9)                  | 451 (25.0)  | 21 (22.6) | 430 (25.2)  |      |
| Obesity (>30)                           | 839 (41.1)  | 47 (44.4) | 792 (40.9)  |      |
| Ever Smoked                             |             |           |             | 0.51 |
| Yes                                     | 580 (32.6)  | 34 (35.9) | 546 (32.3)  |      |
| No                                      | 1339 (67.4) | 69 (64.1) | 1270 (67.7) |      |
| Ever taken hormone-based contraception? |             |           |             | 0.38 |
| Yes                                     | 1328 (75.4) | 73 (71.3) | 1255 (75.7) |      |
| No                                      | 591 (24.6)  | 30 (28.7) | 561 (24.3)  |      |

Values for continuous variables are mean +/- the Standard Error of the Mean.

Values for categorical variables are n (unweighted sample counts) and % (weighted sample percentages to account for NHANES survey design).

If precents do not equal 100% it is due to rounding.

<sup>1</sup> 'Long-term amenorrhea' answered "no" to the question "Have you had at least one menstrual period in the past 12 months? (Please do not include bleedings caused by medical conditions, hormone therapy, or surgeries.)" AND answered "Other" or "Don't know" to the question "What is the reason that you have not had a period in the past 12 months?"

<sup>2</sup> 'Menstruating' if answered "Yes" to the question "Have you had at least one menstrual period in the past 12 months? (Please do not include bleedings caused by medical conditions, hormone therapy, or surgeries.)"

<sup>3</sup> P-Value for categorical variables comes from a chi-squared test, which determines if there is a significant difference between demographics in long-term amenorrhea vs. menstruating women. P-values for continuous variables comes from a t test to determine if there is a significant difference between the means of long-term amenorrhea vs. menstruating.

**Table 6:** Medians and log transformed means of blood heavy metal concentrations and heavy metal mixture scores in women with normal menstruation and long-term amenorrhea

| <b>Metal</b>                             | <b>Total Sample</b> | <b>Long-term amenorrhea<sup>1</sup></b> | <b>Menstruating<sup>2</sup></b> | <b>p-Value<sup>3</sup></b> |
|------------------------------------------|---------------------|-----------------------------------------|---------------------------------|----------------------------|
| Lead, <i>median, IQR</i> (ug / dL)       | 0.53 (0.38 - 0.78)  | 0.52 (0.35 - 0.71)                      | 0.53 (0.38 - 0.78)              | 0.72                       |
| Log Transformed Lead, <i>Mean, SE</i>    | -0.58 ± 0.02        | -0.62 ± 0.09                            | -0.57 ± 0.02                    | 0.60                       |
| Cadmium, <i>median, IQR</i> (ug / L)     | 0.25 (0.16 - 0.44)  | 0.23 (0.12 - 0.41)                      | 0.26 (0.16 - 0.44)              | 0.99                       |
| Log Transformed Cadmium, <i>Mean, SE</i> | -1.25 ± 0.03        | -1.37 ± 0.11                            | -1.25 ± 0.03                    | 0.33                       |
| Mercury, <i>median, IQR</i> (ug / L)     | 0.61 (0.33 - 1.26)  | 0.65 (0.37 - 1.01)                      | 0.61 (0.32 - 1.29)              | 0.004                      |
| Log Transformed Mercury, <i>Mean, SE</i> | -0.37 ± 0.03        | -0.38 ± 0.06                            | -0.37 ± 0.03                    | 0.84                       |
| Mixed Metal, <i>median, IQR</i>          | 2.97 (2.10 – 4.34)  | 2.91 (1.84 – 3.82)                      | 2.97 (2.10 – 4.37)              | 0.74                       |
| Log Transformed Mix, <i>Mean, SE</i>     | 1.13 ± 0.02         | 1.08 ± 0.08                             | 1.13 ± 0.02                     | 0.57                       |

Blood metal distributions were skewed. Therefore, we presented the median and IQR (25<sup>th</sup> and 75<sup>th</sup> percentile) and the mean of the Log Transformed blood metal levels. These results are weighted to account for NHANES survey design.

<sup>1</sup> ‘Long-term amenorrhea’ answered “no” to the question “Have you had at least one menstrual period in the past 12 months? (Please do not include bleedings caused by medical conditions, hormone therapy, or surgeries.)” AND answered “Other” or “Don’t know” to the question “What is the reason that you have not had a period in the past 12 months?”

<sup>2</sup> ‘Menstruating’ if answered “Yes” to the question “Have you had at least one menstrual period in the past 12 months? (Please do not include bleedings caused by medical conditions, hormone therapy, or surgeries.)”

<sup>3</sup> P-Values represent a t test to determine if there is a significant difference between the means of long-term amenorrhea vs. menstruating.

**Table 7:** Associations between blood heavy metal concentrations and heavy metal mixture scores and women’s long-term amenorrhea

| Characteristics            | Total N (%) <sup>1</sup> | Full sample (Long-term amenorrhea <sup>1</sup> vs Menstruating <sup>2</sup> n=1919) |                           |                         |                               |
|----------------------------|--------------------------|-------------------------------------------------------------------------------------|---------------------------|-------------------------|-------------------------------|
|                            |                          | Long-term amenorrhea n (%) or Mean (SD)                                             | Crude OR (95% CI) Model 1 | Adj OR (95% CI) Model 2 | Fully Adj OR (95% CI) Model 3 |
| <b>LEAD</b>                |                          |                                                                                     |                           |                         |                               |
| Log Transformed, Mean (SD) | -0.53 (0.62)             | -0.54 (0.56)                                                                        | 0.88 (0.53 - 1.46)        | 0.89 (0.53 - 1.50)      | 0.93 (0.54 - 1.59)            |
| Quartiles, n (%)           |                          |                                                                                     |                           |                         |                               |
| Q1 (≤0.39)                 | 460 (23.97%)             | 22 (1.15%)                                                                          | Ref                       | Ref                     | Ref                           |
| Q2 (0.40 - 0.55)           | 475 (24.75%)             | 27 (1.41%)                                                                          | 0.99 (0.41 - 2.35)        | 1.02 (0.42 - 2.50)      | 1.04 (0.42 - 2.54)            |
| Q3 (0.56 - 0.83)           | 504 (26.26%)             | 32 (1.67%)                                                                          | 1.03 (0.46 - 2.32)        | 1.03 (0.46 - 2.32)      | 1.06 (0.46 - 2.42)            |
| Q4 (>0.83)                 | 480 (25.01%)             | 22 (1.15%)                                                                          | 0.71 (0.31 - 1.61)        | 0.72 (0.31 - 1.68)      | 0.76 (0.31 - 1.85)            |
| <b>CADMIUM</b>             |                          |                                                                                     |                           |                         |                               |
| Log Transformed, Mean (SD) | -1.16 (0.83)             | -1.27 (0.94)                                                                        | 0.84 (0.58 - 1.22)        | 0.73 (0.48 - 1.09)      | 0.72 (0.49 - 1.08)            |
| Quartiles, n (%)           |                          |                                                                                     |                           |                         |                               |
| Q1 (≤0.18)                 | 455 (23.71%)             | 38 (1.98%)                                                                          | Ref                       | Ref                     | Ref                           |
| Q2 (0.18 - 0.28)           | 490 (25.53%)             | 23 (1.20%)                                                                          | 0.49 (0.26 - 0.91)*       | 0.47 (0.25 - 0.87)*     | 0.47 (0.25 - 0.87)*           |
| Q3 (0.29 - 0.51)           | 488 (25.43%)             | 16 (0.83%)                                                                          | 0.36 (0.16 - 0.82)*       | 0.31 (0.13 - 0.75)*     | 0.31 (0.13 - 0.76)*           |
| Q4 (>0.51)                 | 486 (25.33%)             | 26 (1.35%)                                                                          | 0.69 (0.34 - 1.38)        | 0.52 (0.23 - 1.20)      | 0.53 (0.24 - 1.21)            |
| <b>MERCURY</b>             |                          |                                                                                     |                           |                         |                               |
| Log Transformed, Mean (SD) | -0.29 (0.98)             | -0.38 (-1.61)                                                                       | 0.98 (0.84 - 1.15)        | 1.10 (0.92 - 1.32)      | 1.11 (0.91 - 1.36)            |
| Quartiles, n (%)           |                          |                                                                                     |                           |                         |                               |

|                               |              |             |                    |                    |                    |
|-------------------------------|--------------|-------------|--------------------|--------------------|--------------------|
| Q1 ( $\leq 0.34$ )            | 471 (24.54%) | 25 (1.30%)  | Ref                | Ref                | Ref                |
| Q2 (0.35 – 0.68)              | 485 (25.27%) | 30 (1.56%)  | 1.60 (0.82 - 3.13) | 1.68 (0.83 - 3.42) | 1.70 (0.84 - 3.44) |
| Q3 (0.69 – 1.39)              | 480 (25.01%) | 27 (1.41%)  | 1.60 (0.81 - 3.19) | 1.87 (0.92 - 3.82) | 1.87 (0.92 - 3.77) |
| Q4 ( $> 1.39$ )               | 483 (25.17%) | 21 (1.09%)  | 0.91 (0.53 - 1.56) | 1.18 (0.65 - 2.14) | 1.19 (0.63 - 2.25) |
| <b>MIX</b>                    |              |             |                    |                    |                    |
| Log Transformed,<br>Mean (SD) | 1.18 (0.60)  | 1.17 (0.56) | 0.86 (0.51 - 1.46) | 0.86 (0.50 - 1.47) | 0.82 (0.35 - 1.93) |
| Quartiles, n (%)              |              |             |                    |                    |                    |
| Q1 ( $\leq 2.21$ )            | 479 (24.96%) | 24 (1.25%)  | Ref                | Ref                | Ref                |
| Q2 (2.21 – 3.10)              | 480 (25.01%) | 25 (1.30%)  | 0.71 (0.31 - 1.63) | 0.71 (0.30 - 1.67) | 0.74 (0.29 - 1.85) |
| Q3 (3.10 – 4.66)              | 480 (25.01%) | 27 (1.41%)  | 0.86 (0.39 – 1.90) | 0.86 (0.39 - 1.92) | 0.93 (0.37 - 2.34) |
| Q4 ( $> 4.66$ )               | 480 (25.01%) | 27 (1.41%)  | 0.83 (0.40 - 1.74) | 0.85 (0.39 - 1.84) | 1.04 (0.42 - 2.58) |

\*Statistically significant and corresponding  $p$ -value  $< 0.05$

Values are unweighted sample counts and percentages.

<sup>1</sup> 'Long-term amenorrhea' answered "no" to the question "Have you had at least one menstrual period in the past 12 months? (Please do not include bleedings caused by medical conditions, hormone therapy, or surgeries.)" AND answered "Other" or "Don't know" to the question "What is the reason that you have not had a period in the past 12 months?"

<sup>2</sup> 'Menstruating' if answered "Yes" to the question "Have you had at least one menstrual period in the past 12 months? (Please do not include bleedings caused by medical conditions, hormone therapy, or surgeries.)"
